# Supplementary material for: Global trends in incidence, death, burden and risk factors of early-onset cancer from 1990 to 2019
Source: HighWire-hosted journal article supplement (doi:10.1136/bmjonc-2023-000049), 2023-07-01

## Supplementary Methods

### Data source, definition of early-onset cancer and risk factors

We extracted metadata on the burden of 29 early-onset cancers at the global, regional and national levels from the GBD 2019 database, which is accessible via the GBD citation tool online (<http://ghdx.healthdata.org/gbd-2019>)<sup>1</sup>. Twenty-nine early-onset cancers were ascertained from administrative data according to International Classification of Disease version 9 (ICD-9) and 10 (ICD-10) codes, the ICD codes of 29 cancers are shown in Supplementary Table S1. Early-onset cancer was defined as cancer cases diagnosed from 14 to 49 years<sup>2</sup>. In total, 204 countries were divided into five-level regions based on the socio-demographic index (SDI), the SDI comprehensively represents development status in different regions<sup>3</sup>. It was calculated based on lag distributed income per capita, mean years of schooling for individuals 15 years and older, and total fertility rate for individuals younger than 25 years, ranging 0 to 1<sup>4</sup>. The human development index (HDI) data were obtained at the national level from the World Bank. The GBD database in 2019 estimated the population (including a comprehensive update on fertility and migration), mortality and life expectancy for a total of 990 locations, in 204 countries and territories based on a total of 1250 censuses and 747 location-years of population registry data. In addition, the Bayesian population model was used to reconcile censuses and registry data<sup>1</sup>. We considered morbidity and mortality, defined as the number of incident cases and deaths per 100k individuals. The burden of early-onset

cancer expressed by DALYs was retrieved to represent healthy years lost annually per 100k individuals)<sup>5</sup>. The DALY equation is as follows:  $DALYs = \text{years lived with disability (YLDs)} + \text{years of life lost (YLLs)}$ . YLDs was estimated by diagnosis or treatment, remission, metastatic disseminate, and terminal phase modules, and each module prevalence multiplied by a disability weight was to calculate YLDs. YLLs was calculated by multiplying the number of deaths in the specific age with the corresponding standard life expectancy.

GBD 2019 examined three groups risk factors (environmental and occupational, behavioural, and metabolic), including 23 cancer types and 34 risk factors, with risk factors identified with the World Cancer Research Fund (WCRF) criteria<sup>6</sup>. Behavioral (including dietary risk factors) and metabolic risk factors were examined for their attributable risk to the burden of early-onset cancer in this study. Definitions of these risk factors and method for calculating the proportions of their attribution are described and reported in the previous study<sup>7</sup>. Briefly, to evaluate the burden associated with each risk factor, the GBD 2019 adopted the basic framework developed for comparative risk assessment, including six main steps for each risk–outcome pair<sup>7,8</sup>. First, risk factors with persuasive or likely evidence of a causal connection were identified using the World Cancer Research Fund criteria. For GBD 2019, systematic reviews were revised to ensure that risk factors were appropriately included<sup>7</sup>. Second, existing systematic reviews were updated and meta-analyses of relative risks were performed using GBD's meta-regression-Bayesian, regularised, trimmed

tool in order to estimate relative risks for each risk–outcome pair as a function of exposure. Third, risk factor exposure levels and distributions were modeled with Bayesian meta-regression modelling (DisMod-MR 2.1) or spatiotemporal Gaussian process regression for every age, sex, location, and year combination using data from published studies. Fourth, the theoretical minimum risk exposure level of risk factor was confirmed. Fifth, the population attributable fraction of corresponding risk factor was calculated across age, sex, location, and year, based on the risk function, exposure level and the theoretical minimum risk exposure level. Sixth, mediation was considered for some risk factor to estimate the population attributable fraction <sup>7</sup>.

### Statistical analysis

The incidence rate, death rate and estimated annual percentage change (EAPC) were used to quantify the epidemic trends of 29 early-onset cancers. EAPC was applied to depict the trends of morbidity and mortality, which has been widely used in public health studies <sup>9,10</sup>. A regression line was fitted to the natural logarithm of the rates, and the EAPC and its 95% confidence intervals (CIs) were calculated by the linear regression model. The formulas were as follows:

$$y = \alpha + \beta x + \varepsilon$$

$$EAPC = 100 \times (\exp(\beta) - 1)$$

Thereinto,  $y = \ln(\text{rate})$  and  $x = \text{calendar year}$ . Meanwhile, we conducted the age-standardization to balance multiple population with different age structures

or for the same population over time to facilitate the comparison between different regions and nations. The age-standardized rate (ASR)/100k population, including age-standardized incidence rate (ASIR) and age-standardized death rate (ASDR), were estimated with the following formula:

$$ASR = \frac{\sum_{i=1}^A a_i W_i}{\sum_{i=1}^A W_i} \times 100k$$

For above formula,  $\alpha_i$  meant the age-specific rate in the  $i^{\text{th}}$  age group,  $w$  meant the number of population (or the weight) in the corresponding  $i^{\text{th}}$  age group from among the selected reference standard population (global populations from 1990 to 2019 used in this study from GBD) (Table S2), and  $A$  meant the number of age groups. The age groups for age-standardized included 15-19 years, 20-24 years, 25-29 years, 30-34 years, 35-39 years, 40-44 years and 45-49 years. We explored the associations between EAPCs and HDI in 2019 using Spearman correlation analysis. Additionally, the Bayesian age-period-cohort (BAPC) model integrating nested Laplace approximations was used to project the morbidity and mortality of the disease burden attributable to early-onset cancer from 2020 to 2030 <sup>11</sup>, and the formula was as follow:

$$R_{ijk} = \mu + \alpha_i \text{ Age} + \beta_j \text{ Period} + \gamma_k$$

Among the parameters of the formula,  $\mu$  as a constant,  $R_{ijk}$  represents the incidence or mortality rate in the  $i^{\text{th}}$  age group,  $j^{\text{th}}$  time period, and  $k^{\text{th}}$  birth cohort.  $\alpha_i$ ,  $\beta_j$ , and  $\gamma_k$  are the effects of age, time period, and birth cohort. In the BAPC model, the prior probability distribution of time period and birth cohort

effects were the prior information, and the effects of age, period, and cohort through a random walk of different orders were estimated<sup>11</sup>. To avoid over dispersion, an independent random effect,  $z_{ij} \sim (0, k_z^{-1})$ , was added into the model:

$$R_{ijk} = \mu + \alpha_i \text{Age} + \beta_{j+t} \text{Period} + \gamma_{k+t} \text{Cohort} + z_{ij+t}$$

Data analysis and graphics were conducted using R 4.2.1 (Lucent Technologies, Jasmine Mountain, USA). *P*-value < 0.05 was considered to be statistically significant.

## Reference

1. Global burden of 369 diseases and injuries in 204 countries and territories, 1990-2019: a systematic analysis for the Global Burden of Disease Study 2019. *Lancet* 2020; **396**(10258): 1204-22.
2. Gu WJ, Pei JP, Lyu J, et al. The Burden of Early-Onset Colorectal Cancer and Its Risk Factors from 1990 to 2019: A Systematic Analysis for the Global Burden of Disease Study 2019. *Cancers (Basel)* 2022; **14**(14).
3. Global, regional, and national incidence, prevalence, and years lived with disability for 354 diseases and injuries for 195 countries and territories, 1990-2017: a systematic analysis for the Global Burden of Disease Study 2017. *Lancet* 2018; **392**(10159): 1789-858.
4. Beck S, Wojdyla D, Say L, et al. The worldwide incidence of preterm birth: a systematic review of maternal mortality and morbidity. *Bull World Health Organ* 2010; **88**(1): 31-8.
5. Murray CJ, Lopez AD. Evidence-based health policy--lessons from the Global Burden of Disease Study. *Science* 1996; **274**(5288): 740-3.
6. World Cancer Research Fund AlFC, Research. Food, nutrition, and physical activity, and the prevention of cancer: a global perspective. *Washington, DC: American Institute for Cancer Research* 2007.
7. Global burden of 87 risk factors in 204 countries and territories, 1990-2019: a systematic analysis for the Global Burden of Disease Study 2019. *Lancet* 2020; **396**(10258): 1223-49.
8. The global burden of cancer attributable to risk factors, 2010-19: a systematic analysis for the Global Burden of Disease Study 2019. *Lancet* 2022; **400**(10352): 563-91.
9. Ou ZJ, Yu DF, Liang YH, et al. Trends in burden of multidrug-resistant tuberculosis in countries, regions, and worldwide from 1990 to 2017: results from the Global Burden of Disease study. *Infect Dis Poverty* 2021; **10**(1): 24.

10. Hankey BF, Ries LA, Kosary CL, et al. Partitioning linear trends in age-adjusted rates. *Cancer Causes Control* 2000; **11**(1): 31-5.
11. Riebler A, Held L. Projecting the future burden of cancer: Bayesian age-period-cohort analysis with integrated nested Laplace approximations. *Biom J* 2017; **59**(3): 531-49.

**Table S1.** The International Classification of Disease version 9 and 10 codes of 29 early-onset cancers

| Cause                                   | ICD10                                                            | ICD10 Used in Hospital/Claims Analyses | ICD9                                                         | ICD9 Used in Hospital/Claims Analyses |
|-----------------------------------------|------------------------------------------------------------------|----------------------------------------|--------------------------------------------------------------|---------------------------------------|
| Bladder cancer                          | C67-C67.9, Z12.6-Z12.79, Z80.52, Z85.51                          |                                        | 188-188.9, V10.51, V16.52, V76.3                             |                                       |
| Brain and central nervous system cancer | C70-C70.1, C70.9-C72.9, Z85.841-Z85.848, Z86.011                 |                                        | 191-191.9                                                    |                                       |
| Breast cancer                           | C50-C50.629, C50.8-C50.929, Z12.3-Z12.39, Z80.3, Z85.3, Z86.000  |                                        | 174-175.9, V10.3, V16.3                                      |                                       |
| Cervical cancer                         | C53-C53.9, Z12.4, Z85.41                                         |                                        | 180-180.9, V10.41, V72.32                                    |                                       |
| Colon and rectum cancer                 | C18-C19.0, C20, C21-C21.8, Z12.1-Z12.13, Z85.03-Z85.048, Z86.010 |                                        | 153-154.9, 209.1-209.17, V10.05-V10.06, V76.41, V76.5-V76.52 |                                       |
| Esophageal cancer                       | C15-C15.9, Z85.01                                                |                                        | 150-150.9                                                    |                                       |
| Gallbladder and biliary tract cancer    | C23, C24-C24.9                                                   |                                        | 156-156.9                                                    |                                       |
| Hodgkin lymphoma                        | C81-C81.49, C81.7-C81.79, C81.9-C81.99, Z85.71-Z85.72            |                                        | 201-201.98, V10.72                                           |                                       |
| Kidney cancer                           | C64-C64.2, C64.9-C65.9, Z80.51, Z85.52-Z85.54                    |                                        | 189-189.1, 189.5-189.6, 209.24                               |                                       |
| Larynx cancer                           | C32-C32.9, Z85.21                                                |                                        | 161-161.9, V10.21                                            |                                       |
| Leukemia                                | C91-C93.7, C93.9-C95.2, C95.7-C95.92, Z80.6, Z85.6               |                                        | 204-208.92, V10.59-V10.69, V16.6                             |                                       |
| Lip and oral cavity cancer              | C00-C07, C08-C08.9, Z85.81-Z85.810                               |                                        | 140-145.9, V76.42                                            |                                       |
| Liver cancer                            | C22-C22.4, C22.7-C22.9, Z85.05                                   |                                        | 155-155.9, V10.07                                            |                                       |
| Malignant skin melanoma                 | C43-C43.9, Z85.82-Z85.828                                        |                                        | 172-172.9                                                    |                                       |

|                                     |                                                   |               |                                                            |               |
|-------------------------------------|---------------------------------------------------|---------------|------------------------------------------------------------|---------------|
| Mesothelioma                        | C45-C45.2, C45.7, C45.9                           |               |                                                            |               |
| Multiple myeloma                    | C88-C90.32                                        |               | 203-203.9                                                  |               |
| Nasopharynx cancer                  | C11-C11.9                                         |               | 147-147.9                                                  |               |
| Non-Hodgkin lymphoma                | C82-C85.29, C85.7-C86.6, C96-C96.9                |               | 200-200.9, 202-202.98                                      |               |
| Non-melanoma skin cancer            | C44.01-C44.99                                     | C44.01-C44.92 | 173-173.99                                                 | 173.01-173.92 |
| Other malignant neoplasms           |                                                   |               |                                                            |               |
| Other pharynx cancer                | C09-C10.9, C12-C13.9                              |               | 146-146.9, 148-148.9                                       |               |
| Ovarian cancer                      | C56-C56.2, C56.9, Z80.41, Z85.43                  |               | 183-183.0, 183.8-183.9, V10.43, V16.41                     |               |
| Pancreatic cancer                   | C25-C25.9, Z85.07                                 |               | 157-157.9                                                  |               |
| Prostate cancer                     | C61-C61.9, Z12.5, Z80.42, Z85.46                  |               | 185-185.9, V10.46, V16.42, V76.44                          |               |
| Stomach cancer                      | C16-C16.9, Z12.0, Z85.02-Z85.028                  |               | 151-151.9, 209.23, V10.04                                  |               |
| Testicular cancer                   | C62-C62.92, Z80.43, Z85.47-Z85.48                 |               | 186-186.9, V10.47-V10.48, V16.43                           |               |
| Thyroid cancer                      | C73, Z85.850                                      |               | 193-193.9                                                  |               |
| Tracheal, bronchus, and lung cancer | C33, C34-C34.92, Z12.2, Z80.1-Z80.2, Z85.1-Z85.20 |               | 162-162.9, 209.21, V10.1-V10.20, V16.1-V16.2, V16.4-V16.40 |               |
| Uterine cancer                      | C54-C54.3, C54.8-C54.9, Z85.42, Z86.001           |               | 182-182.9                                                  |               |



**Table S2.** The global populations from 1990 to 2019 from Global Burden of Disease database.

| Age group | Year | Population (Number) |              |              |
|-----------|------|---------------------|--------------|--------------|
|           |      | value               | 95% UI upper | 95% UI lower |
| 15 to 19  | 1990 | 519603412.1         | 530680498.1  | 508300320.3  |
| 20 to 24  | 1990 | 492675757.3         | 503896044.6  | 481582093.4  |
| 25 to 29  | 1990 | 442843296.3         | 452298683.7  | 433270420.5  |
| 30 to 34  | 1990 | 385628936.3         | 393643207.2  | 377634667.2  |
| 35 to 39  | 1990 | 352742337.2         | 360428575.9  | 345093616.7  |
| 40 to 44  | 1990 | 286291792.8         | 292117447.4  | 280385026.7  |
| 45 to 49  | 1990 | 232409454.8         | 237083522.7  | 227751425.8  |
| total     | 1990 | 2712194987          | 2770147980   | 2654017571   |
| 15 to 19  | 1991 | 518431189.8         | 529625669    | 506685286    |
| 20 to 24  | 1991 | 497721431.6         | 509107338.8  | 485392189.6  |
| 25 to 29  | 1991 | 455832152.7         | 466284103.7  | 444935393.9  |
| 30 to 34  | 1991 | 391230084.1         | 399372571.7  | 382820363.8  |
| 35 to 39  | 1991 | 361169652.2         | 369328193    | 352730424    |
| 40 to 44  | 1991 | 300417868           | 306725084.9  | 293732738.6  |
| 45 to 49  | 1991 | 235818955.1         | 240649046.4  | 230624980.1  |
| total     | 1991 | 2760621334          | 2821092008   | 2696921376   |
| 15 to 19  | 1992 | 517752112.3         | 529645040.2  | 505664457.5  |
| 20 to 24  | 1992 | 501355296.6         | 513963392.1  | 488822164.2  |
| 25 to 29  | 1992 | 467066293.3         | 478885507.3  | 455232836.3  |
| 30 to 34  | 1992 | 399751499.4         | 408609391.4  | 390772117.8  |
| 35 to 39  | 1992 | 368327533.8         | 377433002.9  | 359401450.8  |
| 40 to 44  | 1992 | 310706133.5         | 317936104    | 303474218.7  |
| 45 to 49  | 1992 | 244256904           | 249728441    | 238590364.2  |
| total     | 1992 | 2809215773          | 2876200879   | 2741957610   |
| 15 to 19  | 1993 | 518331320.9         | 530589982.8  | 505383791.4  |
| 20 to 24  | 1993 | 503737367.1         | 516634043    | 490381654.2  |
| 25 to 29  | 1993 | 475498861.8         | 488308914.1  | 462208164.3  |
| 30 to 34  | 1993 | 412123993.8         | 422123959.6  | 401912314.7  |
| 35 to 39  | 1993 | 373316483.4         | 382820829.4  | 363520327.1  |
| 40 to 44  | 1993 | 321665708.5         | 329832878.7  | 313297659.4  |
| 45 to 49  | 1993 | 253832429.9         | 259866960.1  | 247418735.3  |
| total     | 1993 | 2858506166          | 2930177568   | 2784122646   |
| 15 to 19  | 1994 | 520867528.1         | 534036366.2  | 507564349.3  |
| 20 to 24  | 1994 | 505044168.7         | 519205490    | 490995146.2  |
| 25 to 29  | 1994 | 481852637           | 496002910.9  | 467594339.3  |
| 30 to 34  | 1994 | 426649539.2         | 438369965    | 415004429.2  |
| 35 to 39  | 1994 | 376959573.7         | 387075630.1  | 366693145.6  |
| 40 to 44  | 1994 | 331572772.1         | 340918924.3  | 322309246.9  |
| 45 to 49  | 1994 | 266054126.5         | 273106002.2  | 258906637.1  |
| total     | 1994 | 2909000345          | 2988715289   | 2829067294   |

|          |      |             |             |             |
|----------|------|-------------|-------------|-------------|
| 15 to 19 | 1995 | 525627131.5 | 539810121.8 | 511786579.1 |
| 20 to 24 | 1995 | 505533844.6 | 520435296.8 | 490792209.9 |
| 25 to 29 | 1995 | 487044565.9 | 502559413.8 | 471506826   |
| 30 to 34 | 1995 | 441148313.6 | 454486155.5 | 427714659.1 |
| 35 to 39 | 1995 | 380779750.6 | 391656066.8 | 370221444.8 |
| 40 to 44 | 1995 | 344801865.7 | 355292420.6 | 334523992.1 |
| 45 to 49 | 1995 | 276148943.3 | 283980606.7 | 268285253.1 |
| total    | 1995 | 2961084415  | 3048220082  | 2874830964  |
| 15 to 19 | 1996 | 532746680   | 546959076.7 | 518596772.5 |
| 20 to 24 | 1996 | 505332329.5 | 519527208.4 | 491141002.5 |
| 25 to 29 | 1996 | 492230166   | 507261276.7 | 477324491.6 |
| 30 to 34 | 1996 | 453915291.6 | 467610171.6 | 440183343.3 |
| 35 to 39 | 1996 | 386716603.9 | 397485130.6 | 376108907.7 |
| 40 to 44 | 1996 | 352517513.3 | 362937302.1 | 342178577.8 |
| 45 to 49 | 1996 | 289621233.1 | 297893216.6 | 281474561.1 |
| total    | 1996 | 3013079817  | 3099673383  | 2927007656  |
| 15 to 19 | 1997 | 541569409.9 | 555217526.3 | 527501869.3 |
| 20 to 24 | 1997 | 505471466.9 | 518641456.4 | 491842204.4 |
| 25 to 29 | 1997 | 496413797.2 | 510280881   | 481685530.6 |
| 30 to 34 | 1997 | 464801665.8 | 478011948.4 | 450670088.8 |
| 35 to 39 | 1997 | 395709386.2 | 405717465.2 | 385116111.9 |
| 40 to 44 | 1997 | 359075632.2 | 368936016.8 | 348777035.7 |
| 45 to 49 | 1997 | 299324118   | 307157744   | 290953335.5 |
| total    | 1997 | 3062365476  | 3143963038  | 2976546176  |
| 15 to 19 | 1998 | 551433118.6 | 564737008   | 538525999.1 |
| 20 to 24 | 1998 | 506664550.5 | 519038997.2 | 494424129.5 |
| 25 to 29 | 1998 | 499486643.4 | 512639674.3 | 486328469.7 |
| 30 to 34 | 1998 | 472793184.4 | 485686479.5 | 459824502.3 |
| 35 to 39 | 1998 | 408547814.3 | 418487971.6 | 398427069.2 |
| 40 to 44 | 1998 | 363613013.4 | 372858162.5 | 354162295.9 |
| 45 to 49 | 1998 | 309743148.6 | 317472961.4 | 301744625.7 |
| total    | 1998 | 3112281473  | 3190921254  | 3033437091  |
| 15 to 19 | 1999 | 561765793.9 | 573840530.8 | 549514415.4 |
| 20 to 24 | 1999 | 509518057.1 | 520480382.6 | 498385100.7 |
| 25 to 29 | 1999 | 501514045.8 | 513289855   | 489588813.4 |
| 30 to 34 | 1999 | 478748391   | 490504854.8 | 466591931.9 |
| 35 to 39 | 1999 | 423428022.5 | 433120590.9 | 413526445.3 |
| 40 to 44 | 1999 | 366896556.8 | 375162052.1 | 358369381.9 |
| 45 to 49 | 1999 | 319090325.7 | 326456829.8 | 311442125.9 |
| total    | 1999 | 3160961193  | 3232855096  | 3087418214  |
| 15 to 19 | 2000 | 572711000.5 | 584570505.3 | 560653361.1 |
| 20 to 24 | 2000 | 514381490.6 | 524841210.7 | 503645582   |
| 25 to 29 | 2000 | 502647111.1 | 513618289.9 | 491343042.8 |
| 30 to 34 | 2000 | 483765873.5 | 494906930.3 | 472250617   |

|          |      |             |             |             |
|----------|------|-------------|-------------|-------------|
| 35 to 39 | 2000 | 438184947.2 | 447954574.6 | 427994194.1 |
| 40 to 44 | 2000 | 370461890.2 | 378141421.5 | 362426860.2 |
| 45 to 49 | 2000 | 331717054.9 | 338950651.7 | 324152892.5 |
| total    | 2000 | 3213869368  | 3282983584  | 3142466550  |
| 15 to 19 | 2001 | 584931684.8 | 597054315.5 | 572619149.4 |
| 20 to 24 | 2001 | 521426557   | 531907452.8 | 510553254.1 |
| 25 to 29 | 2001 | 502778255.8 | 513825110.4 | 491695869.7 |
| 30 to 34 | 2001 | 489107892   | 500472869.5 | 477631548.2 |
| 35 to 39 | 2001 | 450910563.8 | 461444044.9 | 440234900.5 |
| 40 to 44 | 2001 | 376209318   | 384124036.5 | 368094930.6 |
| 45 to 49 | 2001 | 339226508.3 | 347002229.8 | 331428893   |
| total    | 2001 | 3264590780  | 3335830059  | 3192258546  |
| 15 to 19 | 2002 | 597719508.8 | 611699883   | 584089197.3 |
| 20 to 24 | 2002 | 530224078.1 | 542057890.2 | 518438411.4 |
| 25 to 29 | 2002 | 503038577.1 | 514865407.1 | 491191485.6 |
| 30 to 34 | 2002 | 493665792.2 | 506053212.6 | 480975927.6 |
| 35 to 39 | 2002 | 461626087.8 | 473611387.3 | 449411890.2 |
| 40 to 44 | 2002 | 385026319.7 | 393866389.2 | 376014046   |
| 45 to 49 | 2002 | 345682300.8 | 354306020.6 | 337032389.8 |
| total    | 2002 | 3316982664  | 3396460190  | 3237153348  |
| 15 to 19 | 2003 | 609967034.5 | 625187073.2 | 594795523.5 |
| 20 to 24 | 2003 | 540129344.8 | 552899935.6 | 527393988.4 |
| 25 to 29 | 2003 | 504273518.2 | 516656822.7 | 491991160.6 |
| 30 to 34 | 2003 | 497207785.2 | 510054168.9 | 483941892.8 |
| 35 to 39 | 2003 | 469474307.6 | 482259520.7 | 456384977.4 |
| 40 to 44 | 2003 | 397639384.8 | 407361471   | 387558433.6 |
| 45 to 49 | 2003 | 350246132.1 | 359252998.1 | 341021192.2 |
| total    | 2003 | 3368937507  | 3453671990  | 3283087168  |
| 15 to 19 | 2004 | 620429802   | 637255911.9 | 603658073.6 |
| 20 to 24 | 2004 | 550457476.5 | 564531386.4 | 536483664.2 |
| 25 to 29 | 2004 | 507068043.7 | 520080083.6 | 493802524.9 |
| 30 to 34 | 2004 | 499698985.9 | 513656569.5 | 485432029.9 |
| 35 to 39 | 2004 | 475388405.9 | 489074818.6 | 461195035.5 |
| 40 to 44 | 2004 | 412265186.6 | 423386424.4 | 400795939.6 |
| 45 to 49 | 2004 | 353640784.9 | 362892312.4 | 343999007.9 |
| total    | 2004 | 3418948685  | 3510877507  | 3325366276  |
| 15 to 19 | 2005 | 627746727.5 | 645910118.8 | 610174954.4 |
| 20 to 24 | 2005 | 561336218.8 | 576549848.6 | 546265825.3 |
| 25 to 29 | 2005 | 511675130.1 | 525377586.9 | 497735936.5 |
| 30 to 34 | 2005 | 501153714.4 | 515877113.7 | 486530733.2 |
| 35 to 39 | 2005 | 480401874.4 | 495932256.1 | 465451537.8 |
| 40 to 44 | 2005 | 426776464.4 | 439847183.5 | 414157740.4 |
| 45 to 49 | 2005 | 357325169.5 | 367414504.9 | 347377902.8 |
| total    | 2005 | 3466415299  | 3566908613  | 3367694630  |

|          |      |             |             |             |
|----------|------|-------------|-------------|-------------|
| 15 to 19 | 2006 | 630491830.2 | 649229178.7 | 612304102.7 |
| 20 to 24 | 2006 | 573821690   | 590337130.4 | 557843963.4 |
| 25 to 29 | 2006 | 518507526.2 | 533235102.8 | 504281929.5 |
| 30 to 34 | 2006 | 501610073   | 516516227.9 | 486810121.4 |
| 35 to 39 | 2006 | 485831409.2 | 500998980.5 | 470589625.1 |
| 40 to 44 | 2006 | 439314572.4 | 452820313.7 | 425661215.2 |
| 45 to 49 | 2006 | 363172616.8 | 372941316.5 | 352857966.5 |
| total    | 2006 | 3512749718  | 3616078251  | 3410348924  |
| 15 to 19 | 2007 | 629442031.1 | 646295218.8 | 612499765.7 |
| 20 to 24 | 2007 | 587350039.5 | 602610301.3 | 571694341   |
| 25 to 29 | 2007 | 527232718.6 | 540698208.5 | 513836038.1 |
| 30 to 34 | 2007 | 502257145.1 | 515603020.5 | 488928549.6 |
| 35 to 39 | 2007 | 490575061.2 | 504677852.9 | 476275453.3 |
| 40 to 44 | 2007 | 449989584.1 | 462861877.1 | 436648140.7 |
| 45 to 49 | 2007 | 372071189.2 | 381575480.7 | 362348132.8 |
| total    | 2007 | 3558917769  | 3654321960  | 3462230421  |
| 15 to 19 | 2008 | 625501004.8 | 640328892.5 | 610271163.4 |
| 20 to 24 | 2008 | 600238491.1 | 614894853   | 585371297   |
| 25 to 29 | 2008 | 536869167.1 | 549331310.9 | 524396861.2 |
| 30 to 34 | 2008 | 503719503.2 | 515663033.6 | 491411781.7 |
| 35 to 39 | 2008 | 494258405.8 | 507040715.4 | 481382118.5 |
| 40 to 44 | 2008 | 457844356.2 | 469781842.6 | 445508393.3 |
| 45 to 49 | 2008 | 384677767.3 | 393677275.7 | 375189293.5 |
| total    | 2008 | 3603108696  | 3690717924  | 3513530909  |
| 15 to 19 | 2009 | 620182568.5 | 634270507.2 | 606911715   |
| 20 to 24 | 2009 | 610877828   | 625020486.3 | 597067578.1 |
| 25 to 29 | 2009 | 546596215.5 | 558505271.1 | 534922972.6 |
| 30 to 34 | 2009 | 506437833.9 | 517785005.9 | 495277724.2 |
| 35 to 39 | 2009 | 496779149.6 | 508371538.2 | 485216706.2 |
| 40 to 44 | 2009 | 463763007.9 | 475093496.9 | 452442257.9 |
| 45 to 49 | 2009 | 399220279.3 | 408242252.7 | 390258823   |
| total    | 2009 | 3643856883  | 3727288558  | 3562097777  |
| 15 to 19 | 2010 | 614905315.7 | 627682461.7 | 602455449.2 |
| 20 to 24 | 2010 | 618197109.4 | 631506402.2 | 605083502   |
| 25 to 29 | 2010 | 556937766.6 | 568257932.8 | 545572491.3 |
| 30 to 34 | 2010 | 510863945.2 | 521349257.2 | 500365347.5 |
| 35 to 39 | 2010 | 498339906.9 | 509133871.4 | 487396308.4 |
| 40 to 44 | 2010 | 468870865.8 | 479379365.3 | 458374062.7 |
| 45 to 49 | 2010 | 413683324.9 | 422481082.2 | 404810524.7 |
| total    | 2010 | 3681798235  | 3759790373  | 3604057686  |
| 15 to 19 | 2011 | 611004326.6 | 623438739   | 598700918.6 |
| 20 to 24 | 2011 | 621004896   | 634923308   | 607743528.1 |
| 25 to 29 | 2011 | 568854206.8 | 580965354.5 | 557091388.1 |
| 30 to 34 | 2011 | 517307082.1 | 528239970.6 | 506892697.2 |

|          |      |             |             |             |
|----------|------|-------------|-------------|-------------|
| 35 to 39 | 2011 | 498831665.9 | 510054449.4 | 487894843.3 |
| 40 to 44 | 2011 | 474428276.4 | 486099984.6 | 463196920.3 |
| 45 to 49 | 2011 | 426164043   | 436631599.7 | 416101956.1 |
| total    | 2011 | 3717594497  | 3800353406  | 3637622252  |
| 15 to 19 | 2012 | 608599249.6 | 621623994.2 | 595771283.9 |
| 20 to 24 | 2012 | 619902721.6 | 634185027   | 605447816.4 |
| 25 to 29 | 2012 | 581549897.1 | 594815688.9 | 568439583.8 |
| 30 to 34 | 2012 | 525336993.4 | 536676719.7 | 513823571.9 |
| 35 to 39 | 2012 | 499285168.6 | 510948734.5 | 487300751   |
| 40 to 44 | 2012 | 479203061.1 | 491142019.8 | 466882896.6 |
| 45 to 49 | 2012 | 436828062.3 | 448305890.5 | 425072911.3 |
| total    | 2012 | 3750705154  | 3837698075  | 3662738815  |
| 15 to 19 | 2013 | 607448157.1 | 621183643.3 | 593654916.9 |
| 20 to 24 | 2013 | 616102175.2 | 631308923.7 | 601259565.3 |
| 25 to 29 | 2013 | 593849144.7 | 608648508.2 | 579034752.6 |
| 30 to 34 | 2013 | 534426345   | 546818918.7 | 521774076.2 |
| 35 to 39 | 2013 | 500574699.6 | 512891450.5 | 488059434.1 |
| 40 to 44 | 2013 | 482984401.2 | 495903478.9 | 469744193   |
| 45 to 49 | 2013 | 444807473.5 | 457482128.2 | 432033962.4 |
| total    | 2013 | 3780192396  | 3874237052  | 3685560901  |
| 15 to 19 | 2014 | 607279470.4 | 621922154.5 | 592278065.3 |
| 20 to 24 | 2014 | 611104444.2 | 626705120   | 595244495.2 |
| 25 to 29 | 2014 | 604446564.9 | 620120233.1 | 587965973.5 |
| 30 to 34 | 2014 | 544030593.2 | 557351969.7 | 530070906.2 |
| 35 to 39 | 2014 | 503338810.4 | 515992995.6 | 490067180   |
| 40 to 44 | 2014 | 485771436.6 | 499226313.9 | 471956896.2 |
| 45 to 49 | 2014 | 450968489.8 | 464249991.4 | 437468017   |
| total    | 2014 | 3806939810  | 3905568778  | 3705051533  |
| 15 to 19 | 2015 | 608218087.6 | 623622681.7 | 592376348.4 |
| 20 to 24 | 2015 | 606112142.2 | 622744675.2 | 589837526.6 |
| 25 to 29 | 2015 | 612012137   | 628815900.7 | 594577158.7 |
| 30 to 34 | 2015 | 554407501.9 | 569269450.1 | 539122605.6 |
| 35 to 39 | 2015 | 507892129.9 | 521330451.5 | 493847217.8 |
| 40 to 44 | 2015 | 487612069.2 | 501695247.2 | 473185523.3 |
| 45 to 49 | 2015 | 456297755.8 | 470321181.9 | 441780065.7 |
| total    | 2015 | 3832551824  | 3937799588  | 3724726446  |
| 15 to 19 | 2016 | 610093992.1 | 626604794   | 592844022.2 |
| 20 to 24 | 2016 | 602557005.1 | 620090585.6 | 585352846   |
| 25 to 29 | 2016 | 614984761.6 | 633145816.8 | 596184994.3 |
| 30 to 34 | 2016 | 566303551.5 | 582918522.1 | 549474113.7 |
| 35 to 39 | 2016 | 514363495.7 | 529328722.3 | 499336052.5 |
| 40 to 44 | 2016 | 488320878   | 503226274.7 | 473000968.3 |
| 45 to 49 | 2016 | 462025193.2 | 477592660.6 | 446919426.9 |
| total    | 2016 | 3858648877  | 3972907376  | 3743112424  |

|          |      |             |             |             |
|----------|------|-------------|-------------|-------------|
| 15 to 19 | 2017 | 612577366.2 | 630504939   | 594845461.4 |
| 20 to 24 | 2017 | 600599320.1 | 619121599.8 | 582944860.2 |
| 25 to 29 | 2017 | 614004651   | 634481806.8 | 594512501.1 |
| 30 to 34 | 2017 | 578913277.4 | 598037280.6 | 560584333.7 |
| 35 to 39 | 2017 | 522346015.5 | 538808826.4 | 506174465.6 |
| 40 to 44 | 2017 | 488978593.4 | 505035158.4 | 472768963.1 |
| 45 to 49 | 2017 | 466917924.3 | 483082675.1 | 449912324.5 |
| total    | 2017 | 3884337148  | 4009072286  | 3761742910  |
| 15 to 19 | 2018 | 615767495.4 | 633590404.6 | 596886100.5 |
| 20 to 24 | 2018 | 599885085.9 | 618055364.1 | 581519599.2 |
| 25 to 29 | 2018 | 610283133.9 | 630271788.3 | 590563763.3 |
| 30 to 34 | 2018 | 591133850.7 | 610761189.7 | 571645816.6 |
| 35 to 39 | 2018 | 531387014.5 | 548149258.5 | 514538370.3 |
| 40 to 44 | 2018 | 490465267.1 | 506372984.1 | 474366524.5 |
| 45 to 49 | 2018 | 470841955.4 | 487805016.7 | 454027560.5 |
| total    | 2018 | 3909763803  | 4035006006  | 3783547735  |
| 15 to 19 | 2019 | 619540978.1 | 639410643.1 | 600449626   |
| 20 to 24 | 2019 | 600144464.9 | 619566711.2 | 581021870.5 |
| 25 to 29 | 2019 | 605470102.4 | 626202183.3 | 584989358.8 |
| 30 to 34 | 2019 | 601732453.7 | 623410373.9 | 580098350.7 |
| 35 to 39 | 2019 | 540976121.5 | 559170147.5 | 522534368.2 |
| 40 to 44 | 2019 | 493443132.4 | 510303392   | 476222491.8 |
| 45 to 49 | 2019 | 473801065.3 | 491190698.2 | 455039768.8 |
| total    | 2019 | 3935108318  | 4069254149  | 3800355835  |

**Table S3.** Incidence and corresponding EAPC of 29 early-onset cancer types in 1990 and 2019.

| Early-onset cancer types                | 1990 Incidence               |                            | 2019 Incidence               |                            | 1990-2019 Incidence  |
|-----------------------------------------|------------------------------|----------------------------|------------------------------|----------------------------|----------------------|
|                                         | Cases No. (95% UI)           | Rate per 100k No. (95% UI) | Cases No. (95% UI)           | Rate per 100k No. (95% UI) | EAPC No. (95% CI)    |
| Bladder cancer                          | 18851.7 (17877.6-19937)      | 0.7 (0.7-0.7)              | 38922.2 (34991.5-43223.9)    | 1 (0.9-1.1)                | 1 (0.92, 1.08)       |
| Brain and central nervous system cancer | 54922.8 (47514.5-66711.4)    | 2 (1.8-2.5)                | 102687.2 (80889.9-115093.7)  | 2.6 (2.1-2.9)              | 0.8 (0.74, 0.86)     |
| Breast cancer                           | 260836.3 (250473.6-271710.5) | 9.6 (9.2-10)               | 537979.6 (490640.8-588711.2) | 13.7 (12.5-15)             | 1.01 (0.9, 1.12)     |
| Cervical cancer                         | 160770.2 (141427.6-186580.3) | 5.9 (5.2-6.9)              | 256902.2 (215920.8-289544.9) | 6.5 (5.5-7.4)              | 0.28 (0.22, 0.34)    |
| Colorectal cancer                       | 94707.1 (90420.5-99416.4)    | 3.5 (3.3-3.7)              | 225736 (207658-246755.7)     | 5.7 (5.3-6.3)              | 1.73 (1.65, 1.8)     |
| Esophageal cancer                       | 32454.9 (25094.2-36124.1)    | 1.2 (0.9-1.3)              | 40818.9 (36352.6-46025.9)    | 1 (0.9-1.2)                | -0.86 (-1.25, -0.48) |
| Gallbladder and biliary tract cancer    | 9006.6 (8136.5-10218.2)      | 0.3 (0.3-0.4)              | 13722.5 (11736.3-15194.5)    | 0.3 (0.3-0.4)              | 0.18 (0.1, 0.26)     |
| Hodgkin lymphoma                        | 33409.6 (26787.6-36176.5)    | 1.2 (1-1.3)                | 43574.3 (39046.3-52320.7)    | 1.1 (1-1.3)                | -0.47 (-0.54, -0.41) |
| Kidney cancer                           | 23875.5 (22848.6-24856.1)    | 0.9 (0.8-0.9)              | 57999.5 (52884.9-63376.5)    | 1.5 (1.3-1.6)              | 1.75 (1.62, 1.87)    |
| Larynx cancer                           | 16296.6 (15544.1-17094.1)    | 0.6 (0.6-0.6)              | 21549.1 (19780.8-23591)      | 0.5 (0.5-0.6)              | -0.71 (-0.84, -0.58) |
| Leukemia                                | 109042 (96043.9-120420.4)    | 4 (3.5-4.4)                | 155420.8 (139380.4-169956.2) | 3.9 (3.5-4.3)              | -0.25 (-0.33, -0.16) |
| Lip and oral cavity cancer              | 39319.9 (37399.9-41418.2)    | 1.4 (1.4-1.5)              | 74344.2 (66884.1-81548.6)    | 1.9 (1.7-2.1)              | 0.76 (0.69, 0.83)    |
| Liver cancer                            | 88117.2 (76723.3-101492.9)   | 3.2 (2.8-3.7)              | 78299.4 (68668-89097.7)      | 2 (1.7-2.3)                | -2.88 (-3.46, -2.3)  |
| Malignant skin melanoma                 | 38988.2 (29130.2-44281.6)    | 1.4 (1.1-1.6)              | 72968.4 (59581.3-91447.6)    | 1.9 (1.5-2.3)              | 0.68 (0.51, 0.84)    |
| Mesothelioma                            | 2615.4 (1948.1-3556.7)       | 0.1 (0.1-0.1)              | 3740.3 (3161.6-4272.1)       | 0.1 (0.1-0.1)              | -0.32 (-0.43, -0.21) |
| Multiple myeloma                        | 5277.4 (4704.1-6325)         | 0.2 (0.2-0.2)              | 10740.8 (8964.2-12044.2)     | 0.3 (0.2-0.3)              | 0.94 (0.76, 1.13)    |
| Nasopharynx cancer                      | 25238.2 (22682.8-27620.8)    | 0.9 (0.8-1)                | 67915.2 (59442.4-77614.4)    | 1.7 (1.5-2)                | 2.28 (2.1, 2.47)     |
| Non-Hodgkin lymphoma                    | 46087.4 (42095.1-51252.4)    | 1.7 (1.6-1.9)              | 81586.8 (74019-90533.3)      | 2.1 (1.9-2.3)              | 0.51 (0.42, 0.6)     |
| Non-melanoma skin cancer                | 238054.1 (186397-300376.3)   | 8.8 (6.9-11.1)             | 486545 (401341.6-586406.2)   | 12.4 (10.2-14.9)           | 1.59 (1.21, 1.98)    |

|                                     |                              |               |                              |               |                     |
|-------------------------------------|------------------------------|---------------|------------------------------|---------------|---------------------|
| Other malignant neoplasms           | 113396.4 (100921.9-123848)   | 4.2 (3.7-4.6) | 214565.8 (195583-232245.1)   | 5.5 (5-5.9)   | 0.89 (0.85, 0.92)   |
| Other pharynx cancers               | 13257.5 (12364.8-14312.9)    | 0.5 (0.5-0.5) | 26987.7 (24143.1-29674.5)    | 0.7 (0.6-0.8) | 0.9 (0.78, 1.01)    |
| Ovarian cancer                      | 39872 (34417.7-48766.4)      | 1.5 (1.3-1.8) | 79671.9 (68572.8-90845)      | 2 (1.7-2.3)   | 0.91 (0.82, 1)      |
| Pancreatic cancer                   | 17479.4 (16587.8-18435.7)    | 0.6 (0.6-0.7) | 36851.2 (33756.6-40329.9)    | 0.9 (0.9-1)   | 1.14 (1.04, 1.24)   |
| Prostate cancer                     | 7831.4 (6374.4-9087.1)       | 0.3 (0.2-0.3) | 22581.2 (19175.2-27761)      | 0.6 (0.5-0.7) | 2.23 (1.97, 2.49)   |
| Stomach cancer                      | 125974.3 (118139.9-133955.5) | 4.6 (4.4-4.9) | 144321.2 (130472.9-158788.9) | 3.7 (3.3-4)   | -0.84 (-0.99, -0.7) |
| Testicular cancer                   | 34332.8 (27953.8-37230.1)    | 1.3 (1-1.4)   | 72597.2 (64977.7-81950)      | 1.8 (1.7-2.1) | 1.23 (1.18, 1.27)   |
| Thyroid cancer                      | 35055.2 (31179.3-37947)      | 1.3 (1.1-1.4) | 91032.5 (80018.5-99250.1)    | 2.3 (2-2.5)   | 1.96 (1.76, 2.15)   |
| Tracheal, bronchus, and lung cancer | 106306.3 (100111.4-113467.8) | 3.9 (3.7-4.2) | 136946.2 (123422.3-150290.4) | 3.5 (3.1-3.8) | -0.7 (-0.9, -0.5)   |
| Uterine cancer                      | 30231.6 (25409.9-32988)      | 1.1 (0.9-1.2) | 63585.2 (54747.7-71083)      | 1.6 (1.4-1.8) | 1.32 (1.03, 1.62)   |

Abbreviations: EAPC, estimated annual percentage change; UI, uncertainty interval; CI, confidence interval.

**Table S4.** Death and corresponding EAPC of 29 early-onset cancer types in 1990 and 2019.

| Early-onset cancer types                | 1990 Death                |                            | 2019 Death                   |                            | 1990-2019 Death      |
|-----------------------------------------|---------------------------|----------------------------|------------------------------|----------------------------|----------------------|
|                                         | Cases No. (95% UI)        | Rate per 100k No. (95% UI) | Cases No. (95% UI)           | Rate per 100k No. (95% UI) | EAPC No. (95% CI)    |
| Bladder cancer                          | 5598.6 (5227.7-6015.6)    | 0.2 (0.2-0.2)              | 7784 (7090.9-8593.1)         | 0.2 (0.2-0.2)              | -0.42 (-0.53, -0.32) |
| Brain and central nervous system cancer | 37501 (31997.3-45876.4)   | 1.4 (1.2-1.7)              | 55346.1 (43753.7-61463.2)    | 1.4 (1.1-1.6)              | -0.09 (-0.19, 0.01)  |
| Breast cancer                           | 86957.8 (82562.6-92106.1) | 3.2 (3-3.4)                | 136448.7 (124894.9-149068.5) | 3.5 (3.2-3.8)              | 0 (-0.12, 0.12)      |
| Cervical cancer                         | 58081.3 (50008.7-68379)   | 2.1 (1.8-2.5)              | 76549.5 (64144.3-86516.1)    | 1.9 (1.6-2.2)              | -0.42 (-0.5, -0.34)  |
| Colorectal cancer                       | 50436.5 (47475-53367.8)   | 1.9 (1.8-2)                | 86545.6 (80162-93431.1)      | 2.2 (2-2.4)                | 0.48 (0.4, 0.55)     |
| Esophageal cancer                       | 28632.6 (22111.7-31956.5) | 1.1 (0.8-1.2)              | 32955.9 (29538-37482.2)      | 0.8 (0.8-1)                | -1.19 (-1.57, -0.8)  |



|                                      |                            |               |                              |               |                      |
|--------------------------------------|----------------------------|---------------|------------------------------|---------------|----------------------|
| Gallbladder and biliary tract cancer | 6664.5 (5955.8-7687.5)     | 0.2 (0.2-0.3) | 9761.2 (8321.2-10715)        | 0.2 (0.2-0.3) | 0.05 (-0.03, 0.13)   |
| Hodgkin lymphoma                     | 11982.8 (9385-13204.9)     | 0.4 (0.3-0.5) | 11183.8 (9517.9-13128.8)     | 0.3 (0.2-0.3) | -1.73 (-1.83, -1.63) |
| Kidney cancer                        | 6845.8 (6485.6-7172.3)     | 0.3 (0.2-0.3) | 12957.9 (11916.3-14161.8)    | 0.3 (0.3-0.4) | 0.81 (0.7, 0.92)     |
| Larynx cancer                        | 10561.8 (9928.2-11154.6)   | 0.4 (0.4-0.4) | 11834 (10813.4-13097.7)      | 0.3 (0.3-0.3) | -1.28 (-1.42, -1.15) |
| Leukemia                             | 68426.4 (59766.5-75746.6)  | 2.5 (2.2-2.8) | 69298.4 (62141-75429.3)      | 1.8 (1.6-1.9) | -1.44 (-1.54, -1.35) |
| Lip and oral cavity cancer           | 17492.9 (16405.1-18751.3)  | 0.6 (0.6-0.7) | 31258.4 (27932.4-34762.2)    | 0.8 (0.7-0.9) | 0.58 (0.5, 0.66)     |
| Liver cancer                         | 78416.1 (67900.6-90532.2)  | 2.9 (2.5-3.3) | 60602.5 (53310-68336.1)      | 1.5 (1.4-1.7) | -3.39 (-4, -2.77)    |
| Malignant skin melanoma              | 7892 (6189.7-9560.7)       | 0.3 (0.2-0.4) | 9880.3 (8113-12023.4)        | 0.3 (0.2-0.3) | -0.78 (-0.89, -0.68) |
| Mesothelioma                         | 1820.9 (1377-2457.6)       | 0.1 (0.1-0.1) | 2707.8 (2318.1-3058.3)       | 0.1 (0.1-0.1) | -0.14 (-0.24, -0.03) |
| Multiple myeloma                     | 3539.4 (3127.3-4353.6)     | 0.1 (0.1-0.2) | 6418.1 (5369.8-7111.9)       | 0.2 (0.1-0.2) | 0.52 (0.36, 0.67)    |
| Nasopharynx cancer                   | 16563.7 (14922.1-18246.7)  | 0.6 (0.6-0.7) | 17237.5 (15774.7-18851.4)    | 0.4 (0.4-0.5) | -1.44 (-1.57, -1.3)  |
| Non-Hodgkin lymphoma                 | 25306.5 (23603.2-27119)    | 0.9 (0.9-1)   | 38451.3 (35770.2-41630.3)    | 1 (0.9-1.1)   | 0 (-0.08, 0.08)      |
| Non-melanoma skin cancer             | 2517.8 (2321.6-2736.7)     | 0.1 (0.1-0.1) | 3748.6 (3450-4020.7)         | 0.1 (0.1-0.1) | 0.07 (-0.03, 0.17)   |
| Other malignant neoplasms            | 56333.1 (50107.6-60578.5)  | 2.1 (1.8-2.2) | 83689 (75459.7-91529.7)      | 2.1 (1.9-2.3) | -0.06 (-0.1, -0.01)  |
| Other pharynx cancers                | 9215.2 (8498.4-10176.1)    | 0.3 (0.3-0.4) | 16843.5 (14816.9-18804.9)    | 0.4 (0.4-0.5) | 0.56 (0.46, 0.66)    |
| Ovarian cancer                       | 15138.9 (12927.3-18976.1)  | 0.6 (0.5-0.7) | 27759.2 (23923-31721.7)      | 0.7 (0.6-0.8) | 0.59 (0.49, 0.69)    |
| Pancreatic cancer                    | 15285.8 (14453.1-16200.3)  | 0.6 (0.5-0.6) | 32004 (29401.6-34968.4)      | 0.8 (0.7-0.9) | 1.11 (1.01, 1.21)    |
| Prostate cancer                      | 2110.1 (1706.7-2332.4)     | 0.1 (0.1-0.1) | 3574.1 (3008.8-4281.9)       | 0.1 (0.1-0.1) | 0.33 (0.23, 0.44)    |
| Stomach cancer                       | 97382.7 (90808.2-104061.7) | 3.6 (3.3-3.8) | 87333.5 (79904.3-95000.1)    | 2.2 (2-2.4)   | -1.78 (-1.99, -1.58) |
| Testicular cancer                    | 4917.3 (4639.3-5178.3)     | 0.2 (0.2-0.2) | 6867.7 (6306.5-7457.3)       | 0.2 (0.2-0.2) | -0.19 (-0.28, -0.1)  |
| Thyroid cancer                       | 3795.8 (3246-4304)         | 0.1 (0.1-0.2) | 5925.5 (5262.9-6473.7)       | 0.2 (0.1-0.2) | 0.11 (0, 0.22)       |
| Tracheal, bronchus, and lung cancer  | 91573.6 (85931-98019.2)    | 3.4 (3.2-3.6) | 110729.4 (101076.6-120624.3) | 2.8 (2.6-3.1) | -0.94 (-1.14, -0.74) |
| Uterine cancer                       | 5878.3 (4443.6-6749.3)     | 0.2 (0.2-0.2) | 7120.6 (5825.5-7914.1)       | 0.2 (0.1-0.2) | -0.83 (-1.13, -0.52) |

Abbreviations: EAPC, estimated annual percentage change; UI, uncertainty interval; CI, confidence interval.

**Table S5.** Disability-adjusted life years (DALYs) and corresponding EAPC of 29 early-onset cancers in 1990 and 2019.

| Early-onset cancer types                | 1990 DALYs                      |                            | 2019 DALYs                      |                            | 1990-2019 DALYs      |
|-----------------------------------------|---------------------------------|----------------------------|---------------------------------|----------------------------|----------------------|
|                                         | Cases No. (95% UI)              | Rate per 100k No. (95% UI) | Cases No. (95% UI)              | Rate per 100k No. (95% UI) | EAPC No. (95% CI)    |
| Bladder cancer                          | 279920.4 (260428.6-301617.8)    | 10.3 (9.6-11.1)            | 390740.7 (357671.3-429267.4)    | 9.9 (9.1-10.9)             | -0.41 (-0.51, -0.31) |
| Brain and central nervous system cancer | 2027034.2 (1731600.3-2486867.8) | 74.7 (63.8-91.7)           | 2917783.9 (2305065.6-3247570.8) | 74.1 (58.6-82.5)           | -0.17 (-0.26, -0.08) |
| Breast cancer                           | 4327460.9 (4102075.4-4590967.7) | 159.6 (151.2-169.3)        | 6832262.2 (6219746.4-7431400.4) | 173.6 (158.1-188.8)        | 0.02 (-0.1, 0.14)    |
| Cervical cancer                         | 2913442.6 (2504657.5-3437397.7) | 107.4 (92.3-126.7)         | 3801241.7 (3175065.5-4285528.7) | 96.6 (80.7-108.9)          | -0.47 (-0.55, -0.38) |
| Colorectal cancer                       | 2516720.9 (2368905.6-2663625.4) | 92.8 (87.3-98.2)           | 4259922 (3942849.9-4590979.2)   | 108.3 (100.2-116.7)        | 0.42 (0.35, 0.49)    |
| Esophageal cancer                       | 1327637 (1026867.4-1476512.8)   | 49 (37.9-54.4)             | 1516319 (1361708.2-1720376.2)   | 38.5 (34.6-43.7)           | -1.22 (-1.59, -0.84) |
| Gallbladder and biliary tract cancer    | 315792.5 (282111.5-364221.4)    | 11.6 (10.4-13.4)           | 456165.2 (388506.3-500980.1)    | 11.6 (9.9-12.7)            | -0.01 (-0.09, 0.07)  |
| Hodgkin lymphoma                        | 696643.2 (547556.6-767547.2)    | 25.7 (20.2-28.3)           | 650560.1 (554149-764527.6)      | 16.5 (14.1-19.4)           | -1.71 (-1.81, -1.61) |
| Kidney cancer                           | 341994.9 (323772.6-359870.6)    | 12.6 (11.9-13.3)           | 646339.9 (594759.4-706070)      | 16.4 (15.1-17.9)           | 0.82 (0.72, 0.93)    |
| Larynx cancer                           | 496236.2 (467216.1-524227.7)    | 18.3 (17.2-19.3)           | 555495.2 (508685.9-611840.7)    | 14.1 (12.9-15.5)           | -1.29 (-1.42, -1.15) |
| Leukemia                                | 3984968.1 (3463513.2-4416809.9) | 146.9 (127.7-162.9)        | 3913497.7 (3502797.6-4267249.9) | 99.5 (89-108.4)            | -1.54 (-1.64, -1.45) |
| Lip and oral cavity cancer              | 858787.6 (804949.5-919796.6)    | 31.7 (29.7-33.9)           | 1527398 (1366591.5-1697046.4)   | 38.8 (34.7-43.1)           | 0.55 (0.48, 0.63)    |
| Liver cancer                            | 3826682 (3314993-4420259.5)     | 141.1 (122.2-163)          | 2898076.8 (2554655.9-3261451.2) | 73.6 (64.9-82.9)           | -3.46 (-4.06, -2.86) |
| Malignant skin melanoma                 | 415705.6 (327380.4-506830.2)    | 15.3 (12.1-18.7)           | 524345.1 (427761.5-639655.8)    | 13.3 (10.9-16.3)           | -0.74 (-0.84, -0.65) |
| Mesothelioma                            | 91409.1 (67711.5-125083.1)      | 3.4 (2.5-4.6)              | 132402.6 (112421-150038.2)      | 3.4 (2.9-3.8)              | -0.25 (-0.35, -0.14) |
| Multiple myeloma                        | 169068.4 (150052.6-209555.5)    | 6.2 (5.5-7.7)              | 306838.9 (256087.6-340491.4)    | 7.8 (6.5-8.7)              | 0.51 (0.35, 0.67)    |
| Nasopharynx cancer                      | 844065.6 (760336.6-928015.4)    | 31.1 (28-34.2)             | 874186.4 (804883.7-952901.8)    | 22.2 (20.5-24.2)           | -1.47 (-1.61, -1.33) |
| Non-Hodgkin lymphoma                    | 1392131.7 (1294870.8-1494921)   | 51.3 (47.7-55.1)           | 2066163.5 (1924546.4-2237846.4) | 52.5 (48.9-56.9)           | -0.08 (-0.16, -0.01) |
| Non-melanoma skin cancer                | 128327.7 (118778.6-139250.1)    | 4.7 (4.4-5.1)              | 187302.7 (172963.6-200586.2)    | 4.8 (4.4-5.1)              | -0.01 (-0.1, 0.08)   |

|                                     |                               |                     |                                 |                     |                      |
|-------------------------------------|-------------------------------|---------------------|---------------------------------|---------------------|----------------------|
| Other malignant neoplasms           | 3194375 (2838849.1-3437705)   | 117.8 (104.7-126.7) | 4682788.6 (4222113.3-5113396.2) | 119 (107.3-129.9)   | -0.1 (-0.14, -0.05)  |
| Other pharynx cancers               | 436024.6 (401114.7-484058.5)  | 16.1 (14.8-17.8)    | 795774.7 (700405.9-888018.6)    | 20.2 (17.8-22.6)    | 0.55 (0.45, 0.65)    |
| Ovarian cancer                      | 760870.4 (645441.4-960212.7)  | 28.1 (23.8-35.4)    | 1379355.3 (1183284.2-1574161.6) | 35.1 (30.1-40)      | 0.55 (0.45, 0.64)    |
| Pancreatic cancer                   | 723474.5 (682646.9-767793.3)  | 26.7 (25.2-28.3)    | 1489527.7 (1368667.3-1627198.3) | 37.9 (34.8-41.4)    | 1.04 (0.95, 1.13)    |
| Prostate cancer                     | 105476.6 (84960.1-115605.9)   | 3.9 (3.1-4.3)       | 182131.6 (154399-217655.1)      | 4.6 (3.9-5.5)       | 0.41 (0.3, 0.51)     |
| Stomach cancer                      | 4743785.3 (4423216.2-5063886) | 174.9 (163.1-186.7) | 4206556.7 (3853720.9-4566426.9) | 106.9 (97.9-116)    | -1.84 (-2.04, -1.64) |
| Testicular cancer                   | 297954.5 (280555.7-314734.3)  | 11 (10.3-11.6)      | 424469.8 (388485.7-462990)      | 10.8 (9.9-11.8)     | -0.11 (-0.2, -0.02)  |
| Thyroid cancer                      | 215255.2 (182182.9-244090.3)  | 7.9 (6.7-9)         | 347975.8 (306330.9-384509.9)    | 8.8 (7.8-9.8)       | 0.23 (0.12, 0.34)    |
| Tracheal, bronchus, and lung cancer | 4308319.8 (4042416-4611324.6) | 158.8 (149-170)     | 5147912.6 (4703827.5-5611862.2) | 130.8 (119.5-142.6) | -1 (-1.19, -0.8)     |
| Uterine cancer                      | 295925.1 (223759.1-340039.8)  | 10.9 (8.3-12.5)     | 365187 (300719.7-406309.7)      | 9.3 (7.6-10.3)      | -0.76 (-1.05, -0.47) |

Abbreviations: EAPC, estimated annual percentage change; UI, uncertainty interval; CI, confidence interval.

**Table S6.** Incidence and death of early-onset breast cancer, TBL cancer, CRC and stomach cancer by region and sociodemographic index level in 1990 and 2019.

| Cancers       | SDI regions              | 1990 Incidence               |                       | 2019 Incidence               |                       | 1990 Death                |                       | 2019 Death                   |                       |
|---------------|--------------------------|------------------------------|-----------------------|------------------------------|-----------------------|---------------------------|-----------------------|------------------------------|-----------------------|
|               |                          | Cases (95% UI)               | ASR per 100k (95% UI) | Cases (95% UI)               | ASR per 100k (95% UI) | Cases (95% UI)            | ASR per 100k (95% UI) | Cases (95% UI)               | ASR per 100k (95% UI) |
| Breast cancer | Global                   | 260836.3 (250473.6-271710.5) | 11.2 (11.2, 11.3)     | 537979.6 (490640.8-588711.2) | 13.2 (13.1, 13.2)     | 86957.8 (82562.6-92106.1) | 3.7 (3.7, 3.8)        | 136448.7 (124894.9-149068.5) | 3.3 (3.3, 3.4)        |
|               | Low SDI                  | 9363.7 (8001.9-10797.6)      | 5.2 (5.1, 5.3)        | 32559.2 (27874.8-37975.8)    | 7.6 (7.5, 7.7)        | 6211.2 (5321.9-7235.5)    | 3.5 (3.4, 3.6)        | 17240.6 (14793.9-20021.6)    | 4.1 (4, 4.1)          |
|               | Low-middle SDI           | 26776.6 (23729.1-30345.5)    | 6.1 (6, 6.2)          | 83499.4 (72485-95330.3)      | 9.6 (9.6, 9.7)        | 15570.4 (13780.3-17711.6) | 3.6 (3.5, 3.6)        | 35253.3 (30234.7-40788.5)    | 4.1 (4, 4.1)          |
|               | Middle SDI               | 52827.9 (48220.2-57995.7)    | 7.3 (7.2, 7.3)        | 167017.6 (147164.1-187948)   | 12.3 (12.2, 12.3)     | 23883.3 (22021.3-26229.8) | 3.3 (3.3, 3.4)        | 44643.9 (39988.6-49854.2)    | 3.3 (3.2, 3.3)        |
|               | High-middle SDI          | 68200.6 (65207.6-71583)      | 12.4 (12.4, 12.5)     | 134512.5 (119061.7-151755.1) | 15.4 (15.3, 15.5)     | 21200.8 (20171.9-22417)   | 3.9 (3.8, 3.9)        | 24208 (22152-26662)          | 2.8 (2.7, 2.8)        |
|               | High SDI                 | 103495.7 (100980.7-105995.3) | 22.9 (22.8, 23.1)     | 120000.7 (106168.2-134790.7) | 21.1 (21, 21.2)       | 20026.5 (19713.9-20347.4) | 4.4 (4.4, 4.5)        | 14976.3 (14320.5-15639.6)    | 2.6 (2.6, 2.7)        |
|               | High-income Asia Pacific | 13747.9 (12553.4-15103)      | 13.5 (13.3, 13.7)     | 20642.6 (17076.9-24966.4)    | 18.4 (18.2, 18.7)     | 2497 (2441.6-2555.3)      | 2.4 (2.4, 2.5)        | 2237.2 (2117.6-2376.8)       | 2 (1.9, 2)            |

|               |                              |                              |                   |                              |                   |                           |                |                              |                   |
|---------------|------------------------------|------------------------------|-------------------|------------------------------|-------------------|---------------------------|----------------|------------------------------|-------------------|
|               | Central Asia                 | 3310.1 (3141.5-3491.5)       | 13.1 (12.6, 13.6) | 6164.1 (5336.9-7078.8)       | 12.8 (12.5, 13.1) | 1265.5 (1213.4-1323.7)    | 5.1 (4.8, 5.4) | 1816.9 (1584.2-2085)         | 3.8 (3.6, 4)      |
|               | East Asia                    | 34620.3 (27994.9-42038.5)    | 6 (6, 6.1)        | 112508.6 (86987.1-140589.7)  | 12.2 (12.1, 12.2) | 13253.6 (10745.4-16007.2) | 2.3 (2.3, 2.4) | 17176.3 (13618-21402)        | 1.8 (1.8, 1.9)    |
|               | South Asia                   | 21947.2 (18713.6-25110.8)    | 4.9 (4.9, 5)      | 78582.1 (64308.5-94610.5)    | 8.7 (8.6, 8.7)    | 13489.2 (11514.3-15394.2) | 3.1 (3, 3.1)   | 35091.7 (28704.5-42380.8)    | 3.9 (3.9, 3.9)    |
|               | Southeast Asia               | 21600 (18378.9-25278.5)      | 11.4 (11.2, 11.5) | 59060.6 (49804.5-69732.6)    | 15.6 (15.5, 15.7) | 11368.3 (9772.4-13411.8)  | 6.1 (5.9, 6.2) | 20994.5 (17773.5-24976.1)    | 5.5 (5.5, 5.6)    |
|               | Australasia                  | 2775.8 (2597.1-2951)         | 25 (24.1, 26)     | 3720.3 (2886.9-4754.8)       | 23.4 (22.7, 24.2) | 562.2 (540.5-583.5)       | 5.1 (4.7, 5.5) | 451.3 (410.4-491.2)          | 2.8 (2.6, 3.1)    |
|               | Caribbean                    | 2003.3 (1825.4-2178.9)       | 13.3 (12.7, 13.9) | 4010.5 (3175.3-4897.6)       | 16.4 (15.9, 16.9) | 700.7 (622-793.4)         | 4.7 (4.3, 5)   | 1194.9 (910.4-1502.5)        | 4.9 (4.6, 5.2)    |
|               | Central Europe               | 10220.4 (9804.4-10641.4)     | 15.9 (15.6, 16.2) | 11795.2 (9939.4-14053)       | 17.2 (16.9, 17.6) | 3053.8 (2973-3136.4)      | 4.8 (4.6, 4.9) | 2088.7 (1773.9-2451.5)       | 3 (2.9, 3.2)      |
|               | Eastern Europe               | 17469.4 (16717.9-18417.5)    | 15.8 (15.6, 16.1) | 21674.3 (17985.3-26158.4)    | 17.6 (17.4, 17.9) | 5338.2 (5140.1-5589)      | 4.9 (4.7, 5)   | 4333.2 (3601.4-5238.4)       | 3.5 (3.4, 3.6)    |
|               | Western Europe               | 52039.6 (50419.1-53777.5)    | 25.4 (25.1, 25.6) | 59394.1 (50003.8-69938.6)    | 24.7 (24.5, 24.9) | 11030.7 (10835-11242.2)   | 5.4 (5.3, 5.5) | 7185.5 (6867.5-7509.9)       | 3 (2.9, 3)        |
|               | Andean Latin America         | 896.3 (788.8-1018.1)         | 6.2 (5.8, 6.6)    | 2954.3 (2246.2-3790.5)       | 9.2 (8.9, 9.6)    | 451.8 (401.4-513.4)       | 3.1 (2.9, 3.5) | 843.3 (648.7-1083.5)         | 2.6 (2.5, 2.8)    |
|               | Central Latin America        | 4907.4 (4734-5086.4)         | 7.9 (7.7, 8.1)    | 16076.5 (13150.9-19567.4)    | 12.3 (12.1, 12.5) | 1868.4 (1815.7-1920.1)    | 3 (2.9, 3.2)   | 3786.9 (3135.7-4558.6)       | 2.9 (2.8, 3)      |
|               | Southern Latin America       | 3060.1 (2860.6-3275.4)       | 13.2 (12.7, 13.6) | 5524.5 (4019-7322.8)         | 15.3 (14.9, 15.8) | 1232 (1179.3-1287.7)      | 5.3 (5, 5.6)   | 1381.4 (1264.8-1497.8)       | 3.8 (3.6, 4)      |
|               | Tropical Latin America       | 6303.1 (6045.5-6593.2)       | 9.8 (9.5, 10)     | 16561.4 (15390.9-17848.8)    | 13 (12.8, 13.2)   | 2559 (2464.2-2657.4)      | 4 (3.8, 4.1)   | 4356.7 (4078.1-4673.5)       | 3.4 (3.3, 3.5)    |
|               | North Africa and Middle East | 8993.3 (8063.8-10137.6)      | 7.3 (7.2, 7.5)    | 43491.5 (36982-50548.7)      | 13.2 (13.1, 13.3) | 4148.4 (3748.4-4739)      | 3.4 (3.3, 3.5) | 11426.9 (9698-13499.3)       | 3.5 (3.4, 3.6)    |
|               | High-income North America    | 46972.1 (45578.5-48289.6)    | 30.6 (30.4, 30.9) | 43402.7 (34889.3-53837.4)    | 23.1 (22.8, 23.3) | 7915.9 (7750.9-8074.6)    | 5.2 (5.1, 5.3) | 5359.9 (5078.5-5649.8)       | 2.8 (2.8, 2.9)    |
|               | Oceania                      | 424 (323.3-543.6)            | 17 (15.4, 18.7)   | 1528.2 (1139.7-2022)         | 25.3 (24, 26.6)   | 239.1 (180.7-305.1)       | 9.7 (8.5, 11)  | 768.5 (572.4-1017.4)         | 12.8 (11.9, 13.7) |
|               | Central Sub-Saharan Africa   | 1087.7 (813.4-1417.6)        | 6.1 (5.7, 6.4)    | 3773.1 (2690.8-5038.6)       | 7.8 (7.6, 8.1)    | 726.4 (558.8-928.3)       | 4.1 (3.8, 4.4) | 2143.2 (1535.8-2881.2)       | 4.5 (4.3, 4.7)    |
|               | Eastern Sub-Saharan Africa   | 3163 (2485-3839.7)           | 5.3 (5.1, 5.5)    | 9718.2 (7943.7-11706.5)      | 6.5 (6.3, 6.6)    | 2127.5 (1661.3-2563.5)    | 3.6 (3.4, 3.8) | 5252.4 (4293.3-6348.6)       | 3.5 (3.4, 3.6)    |
|               | Southern Sub-Saharan Africa  | 1797.7 (1585.5-2005.5)       | 8.9 (8.5, 9.4)    | 3524.6 (2943.3-4188.6)       | 9 (8.7, 9.3)      | 929.6 (824-1033.7)        | 4.7 (4.4, 5)   | 1540.9 (1281-1851.8)         | 3.9 (3.8, 4.2)    |
|               | Western Sub-Saharan Africa   | 3497.8 (2738.5-4452.2)       | 5.4 (5.2, 5.6)    | 13872.5 (10392.2-17974.7)    | 8.5 (8.4, 8.7)    | 2200.5 (1752.7-2826.1)    | 3.4 (3.3, 3.6) | 7018.5 (5309.3-9219.2)       | 4.3 (4.2, 4.4)    |
|               | Global                       | 106306.3 (100111.4-113467.8) | 4.7 (4.6, 4.7)    | 136946.2 (123422.3-150290.4) | 3.3 (3.3, 3.3)    | 91573.6 (85931-98019.2)   | 4 (4, 4)       | 110729.4 (101076.6-120624.3) | 2.7 (2.7, 2.7)    |
| <b>TBL</b>    | Low SDI                      | 2309.4 (1884.7-2835.5)       | 1.3 (1.3, 1.4)    | 5971.9 (5003.9-7231.2)       | 1.4 (1.4, 1.5)    | 2091.1 (1717.3-2574.8)    | 1.2 (1.2, 1.3) | 5404.3 (4517.7-6571.7)       | 1.3 (1.3, 1.4)    |
| <b>cancer</b> | Low-middle SDI               | 9127.7 (8200.1-10297.6)      | 2.1 (2.1, 2.2)    | 18936.2 (16744-21061.4)      | 2.2 (2.2, 2.2)    | 8234.6 (7345.2-9340.4)    | 1.9 (1.9, 2)   | 16773.6 (14930.5-18639.2)    | 2 (1.9, 2)        |
|               | Middle SDI                   | 31522.5 (28464.1-34800.6)    | 4.4 (4.4, 4.5)    | 51333.3 (44548.7-58301)      | 3.7 (3.7, 3.8)    | 28262.2 (25418.4-31356.9) | 4 (3.9, 4)     | 42952.5 (37467.1-48693.4)    | 3.1 (3.1, 3.1)    |

|            |                              |                           |                |                           |                |                           |                |                           |                |
|------------|------------------------------|---------------------------|----------------|---------------------------|----------------|---------------------------|----------------|---------------------------|----------------|
|            | High-middle SDI              | 36355 (33963.5-39300.2)   | 6.8 (6.7, 6.9) | 39890.6 (35596.5-44418.8) | 4.5 (4.5, 4.6) | 31818.6 (29616.6-34315.3) | 6 (5.9, 6)     | 31370.6 (28381.4-34559.9) | 3.5 (3.5, 3.6) |
|            | High SDI                     | 26944.2 (26511.4-27353.1) | 6 (6, 6.1)     | 20741.6 (18643.1-22901.8) | 3.5 (3.5, 3.6) | 21125.7 (20836.3-21426.2) | 4.7 (4.7, 4.8) | 14166.8 (13567.6-14792.6) | 2.4 (2.4, 2.5) |
|            | High-income Asia Pacific     | 3882.6 (3763.5-3989.8)    | 3.8 (3.7, 3.9) | 3158.8 (2775.1-3594.9)    | 2.7 (2.6, 2.8) | 2887.7 (2806.7-2958.9)    | 2.8 (2.7, 2.9) | 1747.3 (1648.8-1849.1)    | 1.5 (1.4, 1.6) |
|            | Central Asia                 | 1853.6 (1778.7-1926.4)    | 7.6 (7.3, 8)   | 1671.7 (1479.1-1894.5)    | 3.5 (3.3, 3.7) | 1632.9 (1564.9-1697.4)    | 6.8 (6.5, 7.2) | 1456 (1290.1-1652.2)      | 3 (2.9, 3.2)   |
|            | East Asia                    | 36487.8 (31228.2-42291.2) | 6.5 (6.4, 6.5) | 54862.4 (45569-65209.5)   | 5.8 (5.7, 5.8) | 32568.6 (27591.2-37929.5) | 5.8 (5.7, 5.9) | 43343.3 (36305-51578.9)   | 4.5 (4.5, 4.6) |
|            | South Asia                   | 5726.7 (4881.5-6509.9)    | 1.3 (1.3, 1.4) | 14532.6 (12383.6-16642.7) | 1.6 (1.6, 1.7) | 5199.6 (4484.3-5959.1)    | 1.2 (1.2, 1.2) | 13004.3 (11016.6-14900.1) | 1.5 (1.4, 1.5) |
|            | Southeast Asia               | 6762.8 (5969.9-7603.6)    | 3.7 (3.6, 3.8) | 13941 (11257-16662.3)     | 3.7 (3.6, 3.7) | 6109.2 (5395.1-6841.4)    | 3.4 (3.3, 3.5) | 12279.2 (9985.2-14491.7)  | 3.2 (3.2, 3.3) |
|            | Australasia                  | 479.8 (455.9-506.4)       | 4.4 (4, 4.8)   | 515.2 (400.3-660.7)       | 3.2 (2.9, 3.4) | 351.4 (334.8-368.6)       | 3.2 (2.9, 3.6) | 328.8 (297.4-362.7)       | 2 (1.8, 2.2)   |
|            | Caribbean                    | 585 (544.1-631.5)         | 3.9 (3.6, 4.3) | 709.3 (568-867.6)         | 2.9 (2.7, 3.1) | 514.6 (477.9-556.6)       | 3.5 (3.2, 3.8) | 602.5 (482.6-734)         | 2.4 (2.2, 2.6) |
|            | Central Europe               | 5959.9 (5816.7-6108)      | 9.5 (9.2, 9.7) | 3819 (3280.9-4405.5)      | 5.5 (5.3, 5.6) | 5271.3 (5150.4-5400)      | 8.4 (8.1, 8.6) | 3171.8 (2705-3654.7)      | 4.5 (4.4, 4.7) |
|            | Eastern Europe               | 8674.1 (8154.6-9032.5)    | 8.2 (8.1, 8.4) | 5908.5 (5175.6-6758.2)    | 4.8 (4.7, 4.9) | 7429.8 (6991.9-7725.6)    | 7.1 (6.9, 7.2) | 4696.6 (4047.4-5353.6)    | 3.8 (3.7, 3.9) |
|            | Western Europe               | 12812.8 (12545.6-13102.5) | 6.2 (6.1, 6.3) | 10578.7 (8724.1-12465.2)  | 4.2 (4.1, 4.3) | 10396.6 (10201.3-10604.7) | 5 (4.9, 5.1)   | 7431.9 (6968.6-7817.3)    | 2.9 (2.9, 3)   |
|            | Andean Latin America         | 362.3 (311-412.3)         | 2.4 (2.2, 2.7) | 602.7 (456.3-788.3)       | 1.9 (1.7, 2)   | 320.1 (274.4-365.3)       | 2.2 (2, 2.4)   | 515.5 (389.2-671.9)       | 1.6 (1.5, 1.8) |
|            | Central Latin America        | 1418 (1384.5-1453.9)      | 2.3 (2.1, 2.4) | 2227.5 (1841.5-2671.2)    | 1.7 (1.6, 1.8) | 1248.5 (1218.6-1282.3)    | 2 (1.9, 2.1)   | 1877.9 (1553.9-2268)      | 1.4 (1.4, 1.5) |
|            | Southern Latin America       | 1449.1 (1379.8-1523.3)    | 6.3 (6, 6.6)   | 1095.4 (817.6-1443)       | 3 (2.9, 3.2)   | 1301.9 (1238.5-1365.4)    | 5.6 (5.3, 6)   | 921.7 (830.4-1031.6)      | 2.5 (2.4, 2.7) |
|            | Tropical Latin America       | 1901.2 (1841.3-1968)      | 3 (2.9, 3.1)   | 2708.3 (2554.6-2865.1)    | 2.1 (2.1, 2.2) | 1705.9 (1648.1-1766.6)    | 2.7 (2.6, 2.8) | 2353.6 (2222.1-2485.8)    | 1.9 (1.8, 1.9) |
|            | North Africa and Middle East | 3777.1 (2962.8-4633.1)    | 3.1 (3, 3.2)   | 8046.6 (7010-9194.7)      | 2.5 (2.4, 2.5) | 3425.3 (2674.6-4212.9)    | 2.9 (2.8, 3)   | 7098.2 (6158.6-8155.7)    | 2.2 (2.1, 2.3) |
|            | High-income North America    | 11532.9 (11314.8-11759.1) | 7.7 (7.6, 7.9) | 7013.9 (6002.9-8224.9)    | 3.6 (3.5, 3.7) | 8825.3 (8662.3-8993.5)    | 5.9 (5.8, 6.1) | 4878.8 (4673.9-5083.4)    | 2.5 (2.4, 2.6) |
|            | Oceania                      | 92.3 (68.9-134.6)         | 3.7 (3, 4.6)   | 244.4 (171.1-362)         | 4 (3.5, 4.6)   | 81.5 (60.9-118.8)         | 3.3 (2.6, 4.1) | 216.8 (150.7-322)         | 3.6 (3.1, 4.1) |
|            | Central Sub-Saharan Africa   | 421.2 (237.3-848.8)       | 2.5 (2.3, 2.7) | 974.6 (606.3-1753.6)      | 2.1 (2, 2.3)   | 379.6 (213.8-762.5)       | 2.3 (2, 2.5)   | 885.1 (548.8-1601.6)      | 1.9 (1.8, 2.1) |
|            | Eastern Sub-Saharan Africa   | 566.9 (466-710.4)         | 1 (0.9, 1.1)   | 1425.7 (1126.1-1806.8)    | 1 (0.9, 1)     | 511.3 (417.7-640.4)       | 0.9 (0.8, 1)   | 1304.6 (1034-1639.8)      | 0.9 (0.9, 1)   |
|            | Southern Sub-Saharan Africa  | 903.1 (805.3-1029.7)      | 4.8 (4.5, 5.2) | 1074 (929.2-1231.7)       | 2.8 (2.7, 3)   | 823.3 (729.1-934.6)       | 4.4 (4.1, 4.7) | 967 (841.2-1105.6)        | 2.6 (2.4, 2.7) |
|            | Western Sub-Saharan Africa   | 657 (529.4-796.5)         | 1 (0.9, 1.1)   | 1835.8 (1459.4-2241.7)    | 1.1 (1.1, 1.2) | 589.4 (480.4-715.8)       | 0.9 (0.8, 1)   | 1648.4 (1312.8-2024.7)    | 1 (1, 1.1)     |
| <b>CRC</b> | Global                       | 94707.1 (90420.5-99416.4) | 4 (4, 4)       | 225736 (207658-246755.7)  | 5.5 (5.5, 5.5) | 50436.5 (47475-53367.8)   | 2.1 (2.1, 2.2) | 86545.6 (80162-93431.1)   | 2.1 (2.1, 2.1) |
|            | Low SDI                      | 2777 (2284.1-3327.5)      | 1.5 (1.5, 1.6) | 7716.4 (6643-8911.9)      | 1.8 (1.8, 1.8) | 2225.6 (1836.4-2671)      | 1.2 (1.2, 1.3) | 5693 (4933-6582.5)        | 1.3 (1.3, 1.4) |

|                              |                           |                |                           |                 |                           |                |                           |                |
|------------------------------|---------------------------|----------------|---------------------------|-----------------|---------------------------|----------------|---------------------------|----------------|
| Low-middle SDI               | 8615 (7710.5-9669.5)      | 1.9 (1.9, 2)   | 24979.5 (22488.3-27829.7) | 2.9 (2.8, 2.9)  | 6433.1 (5715.1-7231.1)    | 1.5 (1.4, 1.5) | 15376.2 (13666.2-17136.9) | 1.8 (1.7, 1.8) |
| Middle SDI                   | 23377.9 (21458.4-25471.2) | 3.1 (3.1, 3.1) | 75841.7 (67256.8-85383.6) | 5.6 (5.5, 5.6)  | 15311.1 (13878-16640)     | 2.1 (2, 2.1)   | 31223.5 (28190.6-34399.3) | 2.3 (2.3, 2.3) |
| High-middle SDI              | 27712.9 (26289.2-29502.6) | 5 (4.9, 5.1)   | 69605.6 (62366.1-77641.5) | 8.1 (8, 8.1)    | 14897.7 (14014.1-15826.3) | 2.7 (2.7, 2.7) | 22183.4 (20248.8-24368.7) | 2.6 (2.5, 2.6) |
| High SDI                     | 32179.4 (31645.5-32734.2) | 7.2 (7.1, 7.3) | 47489.7 (43601.5-51742.5) | 8.4 (8.3, 8.5)  | 11544 (11365.8-11718.1)   | 2.6 (2.5, 2.6) | 12020.1 (11559.8-12508.9) | 2.1 (2.1, 2.1) |
| High-income Asia Pacific     | 7952.7 (7713.7-8186.5)    | 7.8 (7.6, 8)   | 9294.5 (8006.7-10617.2)   | 8.3 (8.1, 8.5)  | 2837.1 (2778.7-2891.7)    | 2.8 (2.7, 2.9) | 2056.4 (1941.2-2159.5)    | 1.8 (1.7, 1.9) |
| Central Asia                 | 1297.1 (1243.5-1358.5)    | 4.8 (4.5, 5.1) | 1830.9 (1636.7-2062.3)    | 3.8 (3.6, 4)    | 805.5 (773.3-844)         | 3 (2.8, 3.3)   | 982.6 (878.4-1113.7)      | 2 (1.9, 2.2)   |
| East Asia                    | 25347.7 (22184.8-28937.6) | 4.2 (4.2, 4.3) | 90911 (76318.1-106893.9)  | 10 (10, 10.1)   | 15532.2 (13405-17867.5)   | 2.6 (2.6, 2.7) | 27447.4 (23104-32222.8)   | 3 (3, 3)       |
| South Asia                   | 6135.9 (5396.9-6948.6)    | 1.4 (1.3, 1.4) | 18253.4 (15671.1-21008.5) | 2 (2, 2.1)      | 4824.3 (4265.5-5454.8)    | 1.1 (1.1, 1.1) | 12420.9 (10757.6-14391.2) | 1.4 (1.4, 1.4) |
| Southeast Asia               | 6101.4 (5194.6-6824)      | 3.2 (3.1, 3.2) | 18976.3 (15675-22334.4)   | 5 (5, 5.1)      | 4241 (3616.7-4793)        | 2.2 (2.2, 2.3) | 10550.2 (8800.3-12385.5)  | 2.8 (2.7, 2.8) |
| Australasia                  | 941.4 (892.5-992.7)       | 8.6 (8, 9.2)   | 1520.4 (1194.1-1932.8)    | 9.7 (9.2, 10.2) | 320.6 (306.9-335.5)       | 2.9 (2.6, 3.3) | 337.1 (308-369.5)         | 2.1 (1.9, 2.4) |
| Caribbean                    | 575.4 (540.2-611.4)       | 3.7 (3.4, 4)   | 1222 (1005.9-1474)        | 5 (4.7, 5.3)    | 314.2 (292.3-338.6)       | 2 (1.8, 2.3)   | 561.9 (461.2-681.1)       | 2.3 (2.1, 2.5) |
| Central Europe               | 3846.7 (3736.7-3969.4)    | 6.1 (5.9, 6.3) | 4850.4 (4151.5-5578.9)    | 7.2 (7, 7.4)    | 2112.8 (2056.6-2174.4)    | 3.3 (3.2, 3.5) | 1861.5 (1598.2-2134)      | 2.7 (2.6, 2.9) |
| Eastern Europe               | 6810.7 (6347.7-7171.6)    | 6.2 (6.1, 6.4) | 9238.7 (8187.5-10479.7)   | 7.6 (7.5, 7.8)  | 3514.6 (3276-3697.7)      | 3.2 (3.1, 3.3) | 3458.8 (3063-3897.6)      | 2.8 (2.8, 2.9) |
| Western Europe               | 13441.6 (13128.9-13761.4) | 6.6 (6.5, 6.7) | 17020.9 (14619.3-19670.2) | 7.1 (7, 7.2)    | 5082.1 (4991.8-5173.5)    | 2.5 (2.4, 2.5) | 4247 (4053.5-4426.3)      | 1.8 (1.7, 1.8) |
| Andean Latin America         | 351.1 (310.6-399.2)       | 2.3 (2.1, 2.6) | 1507.4 (1159.9-1950.9)    | 4.7 (4.4, 4.9)  | 203.3 (181.1-230.3)       | 1.4 (1.2, 1.6) | 525.7 (410.9-669.4)       | 1.6 (1.5, 1.8) |
| Central Latin America        | 1452.3 (1412.9-1490.4)    | 2.2 (2.1, 2.3) | 5782.2 (4916.4-6815)      | 4.4 (4.3, 4.5)  | 875.6 (852.8-898)         | 1.4 (1.3, 1.5) | 2564 (2170.9-3008.6)      | 2 (1.9, 2)     |
| Southern Latin America       | 949.7 (903.3-999.4)       | 4.1 (3.8, 4.3) | 2233.3 (1694.2-2912.9)    | 6.2 (6, 6.5)    | 584.4 (558-613.2)         | 2.5 (2.3, 2.7) | 1021.5 (936.1-1116.3)     | 2.8 (2.7, 3)   |
| Tropical Latin America       | 1916.8 (1856.5-1983.1)    | 2.9 (2.7, 3)   | 5754.9 (5414.7-6061.3)    | 4.6 (4.4, 4.7)  | 1239 (1200.6-1282.7)      | 1.9 (1.8, 2)   | 2856.8 (2697.7-3003.1)    | 2.3 (2.2, 2.3) |
| North Africa and Middle East | 3125.8 (2608.2-3801.4)    | 2.5 (2.4, 2.5) | 11101.1 (9615.5-12783.3)  | 3.4 (3.3, 3.4)  | 2179.8 (1816-2650.2)      | 1.7 (1.7, 1.8) | 5485 (4715.8-6362.1)      | 1.7 (1.6, 1.7) |
| High-income North America    | 11664.8 (11348.3-11962.4) | 7.7 (7.5, 7.8) | 18499.3 (15902.1-21546.9) | 9.8 (9.7, 10)   | 3604.5 (3516.8-3688.1)    | 2.4 (2.3, 2.5) | 4544.6 (4398.5-4709)      | 2.4 (2.3, 2.5) |
| Oceania                      | 61 (48.7-76)              | 2.4 (1.8, 3.1) | 164.6 (125.9-215.1)       | 2.7 (2.3, 3.1)  | 42.8 (33.7-53.6)          | 1.7 (1.2, 2.3) | 111.8 (84.6-147.5)        | 1.8 (1.5, 2.2) |
| Central Sub-Saharan Africa   | 291.3 (215.4-386.8)       | 1.6 (1.4, 1.8) | 797.7 (566.4-1081.9)      | 1.6 (1.5, 1.8)  | 232 (177.1-305.3)         | 1.3 (1.1, 1.5) | 604.2 (427.9-820.8)       | 1.3 (1.2, 1.4) |
| Eastern Sub-Saharan Africa   | 1066.6 (858.1-1310.7)     | 1.8 (1.6, 1.9) | 3089 (2525.8-3770.4)      | 2 (2, 2.1)      | 849.7 (678.3-1042.6)      | 1.4 (1.3, 1.5) | 2298.2 (1884.8-2807.8)    | 1.5 (1.5, 1.6) |
| Southern Sub-Saharan Africa  | 565.9 (507.9-631.5)       | 2.8 (2.6, 3)   | 1111.1 (955.2-1276.6)     | 2.8 (2.6, 3)    | 405.9 (366.2-451.8)       | 2 (1.8, 2.2)   | 738 (635-851.9)           | 1.9 (1.7, 2)   |
| Western Sub-Saharan Africa   | 811.1 (642.4-1008.6)      | 1.2 (1.1, 1.3) | 2577 (2059.5-3111.6)      | 1.5 (1.5, 1.6)  | 635.1 (500.1-791.2)       | 1 (0.9, 1)     | 1872 (1493.9-2315.5)      | 1.1 (1.1, 1.2) |

|                |                              |                              |                   |                              |                |                            |                |                           |                |
|----------------|------------------------------|------------------------------|-------------------|------------------------------|----------------|----------------------------|----------------|---------------------------|----------------|
|                | Global                       | 125974.3 (118139.9-133955.5) | 5.4 (5.3, 5.4)    | 144321.2 (130472.9-158788.9) | 3.5 (3.5, 3.6) | 97382.7 (90808.2-104061.7) | 4.2 (4.1, 4.2) | 87333.5 (79904.3-95000.1) | 2.1 (2.1, 2.1) |
|                | Low SDI                      | 5835.5 (4920.5-6622.3)       | 3.2 (3.1, 3.3)    | 9441.7 (8062-10865.2)        | 2.2 (2.2, 2.3) | 5185.9 (4411-5845.1)       | 2.9 (2.8, 3)   | 8351.3 (7187-9592)        | 2 (1.9, 2)     |
|                | Low-middle SDI               | 18731.3 (16680.3-20403.8)    | 4.2 (4.2, 4.3)    | 26153 (23536-28918.2)        | 3 (3, 3)       | 16458.5 (14722.8-17964.3)  | 3.8 (3.7, 3.8) | 21408.6 (19236-23771.6)   | 2.5 (2.4, 2.5) |
|                | Middle SDI                   | 41707 (37519.7-46081.8)      | 5.7 (5.7, 5.8)    | 54281.9 (47258.6-61911.5)    | 4 (3.9, 4)     | 34945.5 (31453.6-38870.9)  | 4.8 (4.8, 4.9) | 31097.3 (27804.1-34949.7) | 2.3 (2.2, 2.3) |
|                | High-middle SDI              | 35029.6 (32514.5-37646.2)    | 6.4 (6.3, 6.5)    | 40349.1 (35304.3-45650.3)    | 4.7 (4.6, 4.7) | 27950.4 (25910.2-30134)    | 5.1 (5.1, 5.2) | 20715.7 (18484-22953.5)   | 2.4 (2.3, 2.4) |
|                | High SDI                     | 24633 (24088.8-25166.5)      | 5.5 (5.4, 5.6)    | 14041.5 (12929.2-15275.4)    | 2.5 (2.5, 2.5) | 12811 (12569-13027.3)      | 2.9 (2.8, 2.9) | 5717.8 (5462.9-5995.2)    | 1 (1, 1)       |
|                | High-income Asia Pacific     | 16694.8 (16188.1-17189.8)    | 16.5 (16.3, 16.8) | 6407.9 (5627.8-7282.8)       | 5.9 (5.8, 6.1) | 7715.8 (7482.3-7894.4)     | 7.7 (7.5, 7.8) | 2069 (1943.4-2212.1)      | 1.9 (1.8, 2)   |
|                | Central Asia                 | 2161.1 (2076.7-2244.2)       | 8.5 (8.1, 8.8)    | 1974.4 (1764.8-2229.9)       | 4.1 (3.9, 4.3) | 1875 (1799-1947.7)         | 7.5 (7.1, 7.8) | 1679.7 (1497.9-1900)      | 3.5 (3.3, 3.7) |
|                | East Asia                    | 49304.8 (42924.4-56327.8)    | 8.6 (8.6, 8.7)    | 68382.2 (56611.1-81594.8)    | 7.4 (7.4, 7.5) | 40658 (34888.9-46565.6)    | 7.2 (7.1, 7.3) | 32211.4 (26787.3-38306)   | 3.4 (3.4, 3.5) |
|                | South Asia                   | 14580.2 (12911.5-16083.5)    | 3.2 (3.2, 3.3)    | 21127.2 (18261.3-24233.1)    | 2.3 (2.3, 2.4) | 12915.2 (11397-14184.9)    | 2.9 (2.8, 2.9) | 18314.2 (15927.6-21109.5) | 2 (2, 2.1)     |
|                | Southeast Asia               | 5693.3 (4809.9-6436.8)       | 3 (2.9, 3.1)      | 6354.4 (5397.3-7406.5)       | 1.7 (1.6, 1.7) | 4947.9 (4220.1-5516.7)     | 2.6 (2.5, 2.7) | 5019.6 (4323.5-5812.6)    | 1.3 (1.3, 1.4) |
| Stomach cancer | Australasia                  | 210.7 (198.4-225.6)          | 1.9 (1.7, 2.2)    | 241.8 (185.8-310.1)          | 1.5 (1.4, 1.8) | 118.3 (112.2-124.7)        | 1.1 (0.9, 1.3) | 102.1 (90.4-115.2)        | 0.6 (0.5, 0.8) |
|                | Caribbean                    | 409.5 (348.7-452.6)          | 2.7 (2.4, 2.9)    | 534.8 (432.1-643.9)          | 2.2 (2, 2.4)   | 346.8 (292.9-385.5)        | 2.3 (2, 2.5)   | 436.6 (348.7-528.9)       | 1.8 (1.6, 2)   |
|                | Central Europe               | 2511.2 (2452.4-2570.1)       | 3.9 (3.8, 4.1)    | 1460.4 (1262.4-1678.1)       | 2.2 (2, 2.3)   | 2128.3 (2076.8-2181)       | 3.3 (3.2, 3.5) | 1086.3 (933.4-1254.5)     | 1.6 (1.5, 1.7) |
|                | Eastern Europe               | 9947.9 (9280.4-10297.7)      | 9.1 (8.9, 9.3)    | 6053.2 (5378.7-6793.4)       | 5 (4.9, 5.1)   | 7650.9 (7151.3-7922.7)     | 7 (6.9, 7.2)   | 3706.9 (3262.8-4180.3)    | 3 (2.9, 3.1)   |
|                | Western Europe               | 6142.6 (6007.9-6269.8)       | 3 (2.9, 3.1)      | 4611.8 (3923.7-5399)         | 1.9 (1.9, 2)   | 4002.3 (3924.6-4072)       | 2 (1.9, 2)     | 2168.7 (2043-2296.1)      | 0.9 (0.9, 0.9) |
|                | Andean Latin America         | 985.2 (889-1095.8)           | 6.5 (6.1, 7)      | 1510.6 (1177.3-1917.6)       | 4.7 (4.5, 4.9) | 857.4 (773.2-951)          | 5.8 (5.4, 6.2) | 1185.4 (924.7-1503.6)     | 3.7 (3.5, 3.9) |
|                | Central Latin America        | 2590.3 (2514.5-2662.7)       | 4 (3.9, 4.2)      | 4706.9 (3923.5-5598.5)       | 3.6 (3.5, 3.7) | 2136.9 (2072.6-2197.9)     | 3.4 (3.2, 3.5) | 3253.4 (2730.4-3876.7)    | 2.5 (2.4, 2.6) |
|                | Southern Latin America       | 845.1 (809.6-885.2)          | 3.6 (3.4, 3.9)    | 916 (704.2-1196.6)           | 2.6 (2.4, 2.7) | 694.9 (666.7-726.7)        | 3 (2.8, 3.2)   | 642.9 (591.4-700.2)       | 1.8 (1.6, 1.9) |
|                | Tropical Latin America       | 2493.3 (2410-2578.5)         | 3.8 (3.7, 4)      | 3064.3 (2911-3226.3)         | 2.4 (2.3, 2.5) | 2154.1 (2077.5-2231)       | 3.3 (3.2, 3.5) | 2408.9 (2287.8-2525.5)    | 1.9 (1.8, 2)   |
|                | North Africa and Middle East | 4441 (3842.7-4988.3)         | 3.5 (3.4, 3.6)    | 7272.1 (6170.9-8484)         | 2.2 (2.2, 2.3) | 3858.9 (3342.9-4340.6)     | 3.1 (3, 3.2)   | 5676.5 (4740.1-6694.7)    | 1.7 (1.7, 1.8) |
|                | High-income North America    | 2492.6 (2423.1-2554.1)       | 1.6 (1.6, 1.7)    | 2785.3 (2404.8-3259.4)       | 1.5 (1.4, 1.6) | 1370.1 (1335.5-1400.6)     | 0.9 (0.9, 0.9) | 1226.3 (1174.3-1282.5)    | 0.7 (0.6, 0.7) |
|                | Oceania                      | 126.4 (95.4-158.4)           | 4.9 (4.1, 5.9)    | 293.5 (212-392.5)            | 4.8 (4.2, 5.3) | 108.7 (82.1-136.5)         | 4.3 (3.5, 5.2) | 252.2 (182.5-337.9)       | 4.1 (3.6, 4.7) |
|                | Central Sub-Saharan Africa   | 544.3 (412-697.8)            | 3 (2.8, 3.3)      | 905.5 (672.9-1187.3)         | 1.9 (1.8, 2)   | 480.4 (369.3-599)          | 2.7 (2.5, 3)   | 805.2 (598.7-1067.4)      | 1.7 (1.6, 1.8) |

|                             |                        |                |                        |                |                       |                |                      |                |
|-----------------------------|------------------------|----------------|------------------------|----------------|-----------------------|----------------|----------------------|----------------|
| Eastern Sub-Saharan Africa  | 1916.8 (1532.4-2213.4) | 3.2 (3, 3.3)   | 2711.2 (2256.9-3264.7) | 1.8 (1.7, 1.9) | 1694.9 (1349.6-1954)  | 2.8 (2.7, 3)   | 2432.5 (2017.1-2917) | 1.6 (1.6, 1.7) |
| Southern Sub-Saharan Africa | 562.1 (514.3-608.5)    | 2.8 (2.6, 3.1) | 618.6 (522.2-727.8)    | 1.6 (1.5, 1.7) | 492.3 (450.7-533.2)   | 2.5 (2.3, 2.7) | 535 (454.6-630.1)    | 1.4 (1.3, 1.5) |
| Western Sub-Saharan Africa  | 1320.8 (1108.7-1516.4) | 2 (1.9, 2.1)   | 2389.2 (1933.4-2896)   | 1.4 (1.4, 1.5) | 1175.6 (999.6-1359.9) | 1.8 (1.7, 1.9) | 2120.4 (1707.2-2570) | 1.3 (1.2, 1.3) |

Abbreviations: ASR, age-standardized rate; TBL, tracheal, bronchus, and lung; CRC, colorectal cancer.

**Table S7.** Incidence and and death of all early-onset cancers in 1990 and 2019 by region and sociodemographic index level.

| Location                 | Incidence            |                      | Death             |                   | DALYs                   |                         |
|--------------------------|----------------------|----------------------|-------------------|-------------------|-------------------------|-------------------------|
|                          | 1990 ASR per 100k    | 2019 ASR per 100k    | 1990 ASR per 100k | 2019 ASR per 100k | 1990 ASR per 100k       | 2019 ASR per 100k       |
| Global                   | 75.7 (75.6, 75.8)    | 80.3 (80.2, 80.4)    | 34.7 (34.6, 34.8) | 26.1 (26.1, 26.2) | 1727.9 (1727.3, 1728.4) | 1321.7 (1321.4, 1322.1) |
| Low SDI                  | 43.2 (42.9, 43.5)    | 45.3 (45.1, 45.5)    | 28.4 (28.2, 28.7) | 26.8 (26.6, 26.9) | 1409 (1407.3, 1410.8)   | 1334.7 (1333.7, 1335.8) |
| Low-middle SDI           | 45.5 (45.3, 45.7)    | 52.8 (52.6, 52.9)    | 29.5 (29.3, 29.6) | 27.7 (27.6, 27.8) | 1473.8 (1472.7, 1475)   | 1392.9 (1392.1, 1393.7) |
| Middle SDI               | 59 (58.8, 59.2)      | 68.9 (68.8, 69.1)    | 37 (36.9, 37.2)   | 26.8 (26.7, 26.9) | 1841.2 (1840.2, 1842.2) | 1356.1 (1355.5, 1356.7) |
| High-middle SDI          | 81.5 (81.3, 81.7)    | 94.5 (94.3, 94.7)    | 40.5 (40.3, 40.7) | 26.9 (26.8, 27)   | 2007.1 (2006, 2008.3)   | 1368.5 (1367.7, 1369.3) |
| High SDI                 | 139.1 (138.8, 139.5) | 159.7 (159.4, 160)   | 31.2 (31, 31.3)   | 19.8 (19.7, 20)   | 1563.2 (1562, 1564.3)   | 1023 (1022.1, 1023.8)   |
| High-income Asia Pacific | 82.2 (81.6, 82.8)    | 86.1 (85.5, 86.7)    | 29.5 (29.2, 29.9) | 16.3 (16, 16.5)   | 1486.6 (1484.2, 1489)   | 840.6 (838.7, 842.4)    |
| Central Asia             | 78.8 (77.7, 79.9)    | 72.5 (71.7, 73.2)    | 42.3 (41.5, 43.2) | 31.8 (31.3, 32.3) | 2115.5 (2109.9, 2121.2) | 1609.7 (1606.1, 1613.3) |
| East Asia                | 69.1 (68.9, 69.3)    | 92.5 (92.3, 92.7)    | 46.6 (46.4, 46.8) | 29.6 (29.5, 29.7) | 2301.7 (2300.5, 2302.9) | 1502.2 (1501.3, 1503)   |
| South Asia               | 38.3 (38.1, 38.5)    | 46.3 (46.1, 46.4)    | 25.6 (25.4, 25.7) | 25.9 (25.8, 26)   | 1281.6 (1280.5, 1282.6) | 1301.7 (1300.9, 1302.4) |
| Southeast Asia           | 53.8 (53.5, 54.1)    | 61.1 (60.8, 61.3)    | 32.5 (32.3, 32.8) | 28.4 (28.3, 28.6) | 1631.2 (1629.4, 1633)   | 1437.3 (1436, 1438.5)   |
| Australasia              | 146.2 (144, 148.5)   | 157.7 (155.7, 159.7) | 28.6 (27.6, 29.6) | 20 (19.3, 20.7)   | 1456.1 (1448.9, 1463.2) | 1044.3 (1039.1, 1049.5) |
| Caribbean                | 69.3 (68, 70.6)      | 75.3 (74.3, 76.4)    | 32.4 (31.5, 33.3) | 30.3 (29.6, 31)   | 1626.8 (1620.5, 1633.1) | 1529.7 (1524.8, 1534.6) |
| Central Europe           | 98.3 (97.5, 99.1)    | 103.7 (102.9, 104.5) | 44.8 (44.3, 45.3) | 29.8 (29.4, 30.2) | 2201.6 (2197.9, 2205.3) | 1484.7 (1481.7, 1487.8) |
| Eastern Europe           | 93.5 (92.9, 94.1)    | 108.8 (108.1, 109.4) | 43.4 (43, 43.8)   | 33.7 (33.4, 34)   | 2146.1 (2143.3, 2148.9) | 1698.6 (1696.2, 1701)   |
| Western Europe           | 118.1 (117.6, 118.6) | 125.6 (125.1, 126.1) | 32.6 (32.3, 32.8) | 20.4 (20.2, 20.6) | 1633.7 (1631.9, 1635.4) | 1057.2 (1055.8, 1058.6) |
| Andean Latin America     | 57.9 (56.7, 59.1)    | 68.8 (67.9, 69.7)    | 32.1 (31.2, 33)   | 26.2 (25.6, 26.8) | 1620.7 (1614.4, 1627.1) | 1349.9 (1345.9, 1353.9) |



|                              |                      |                    |                   |                   |                         |                         |
|------------------------------|----------------------|--------------------|-------------------|-------------------|-------------------------|-------------------------|
| Central Latin America        | 60.8 (60.2, 61.4)    | 72.7 (72.3, 73.2)  | 27.7 (27.3, 28.1) | 24.2 (23.9, 24.5) | 1405.2 (1402.3, 1408.1) | 1249.9 (1248, 1251.8)   |
| Southern Latin America       | 86.8 (85.6, 88)      | 94.5 (93.5, 95.5)  | 39.8 (39, 40.6)   | 28.5 (27.9, 29)   | 1977.4 (1971.7, 1983.1) | 1452.6 (1448.6, 1456.5) |
| Tropical Latin America       | 75.8 (75.1, 76.5)    | 83.8 (83.3, 84.3)  | 31.9 (31.4, 32.3) | 26.1 (25.8, 26.3) | 1579.9 (1576.9, 1582.9) | 1316.8 (1314.8, 1318.8) |
| North Africa and Middle East | 44.8 (44.4, 45.1)    | 58.9 (58.7, 59.2)  | 26.4 (26.2, 26.7) | 22.2 (22.1, 22.4) | 1325.4 (1323.4, 1327.3) | 1128.8 (1127.6, 1129.9) |
| High-income North America    | 215.6 (214.8, 216.3) | 273.2 (272.5, 274) | 30.7 (30.4, 31)   | 20.3 (20.1, 20.5) | 1551.6 (1549.6, 1553.6) | 1048.1 (1046.6, 1049.6) |
| Oceania                      | 59.8 (56.8, 62.9)    | 69.6 (67.5, 71.7)  | 36.4 (34.1, 38.9) | 39.1 (37.6, 40.7) | 1814.7 (1798.2, 1831.3) | 1952.6 (1941.6, 1963.7) |
| Central Sub-Saharan Africa   | 45 (44, 46)          | 42.5 (41.9, 43.1)  | 29.2 (28.4, 30)   | 25.5 (25, 25.9)   | 1430.1 (1424.6, 1435.6) | 1253.4 (1250.3, 1256.6) |
| Eastern Sub-Saharan Africa   | 49.7 (49.2, 50.3)    | 46.9 (46.6, 47.3)  | 31.9 (31.5, 32.4) | 27.6 (27.3, 27.8) | 1578.6 (1575.5, 1581.8) | 1373.1 (1371.2, 1374.9) |
| Southern Sub-Saharan Africa  | 70.3 (69.2, 71.5)    | 63.3 (62.5, 64.1)  | 38.9 (38, 39.8)   | 30.4 (29.9, 31)   | 1919.4 (1913.3, 1925.5) | 1506.9 (1503.1, 1510.7) |
| Western Sub-Saharan Africa   | 33.4 (33, 33.8)      | 37.4 (37.1, 37.7)  | 20.9 (20.5, 21.2) | 21.2 (21, 21.4)   | 1033.1 (1030.6, 1035.5) | 1052.5 (1050.9, 1054)   |

Abbreviations: ASR, age-standardized rate.

Figure S1

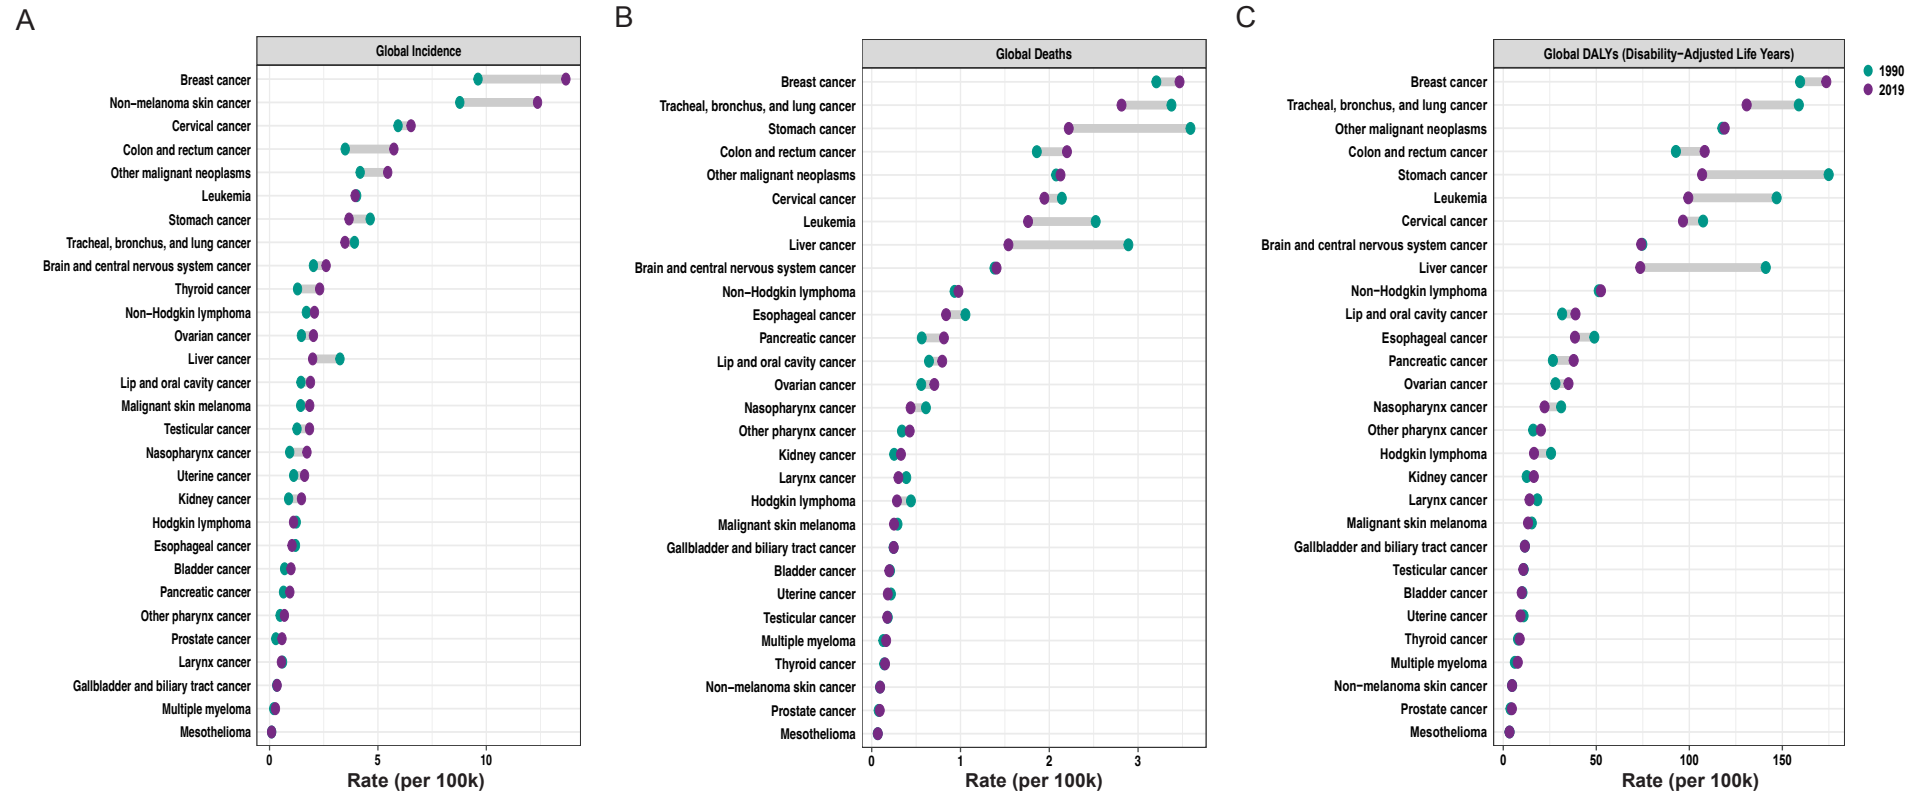

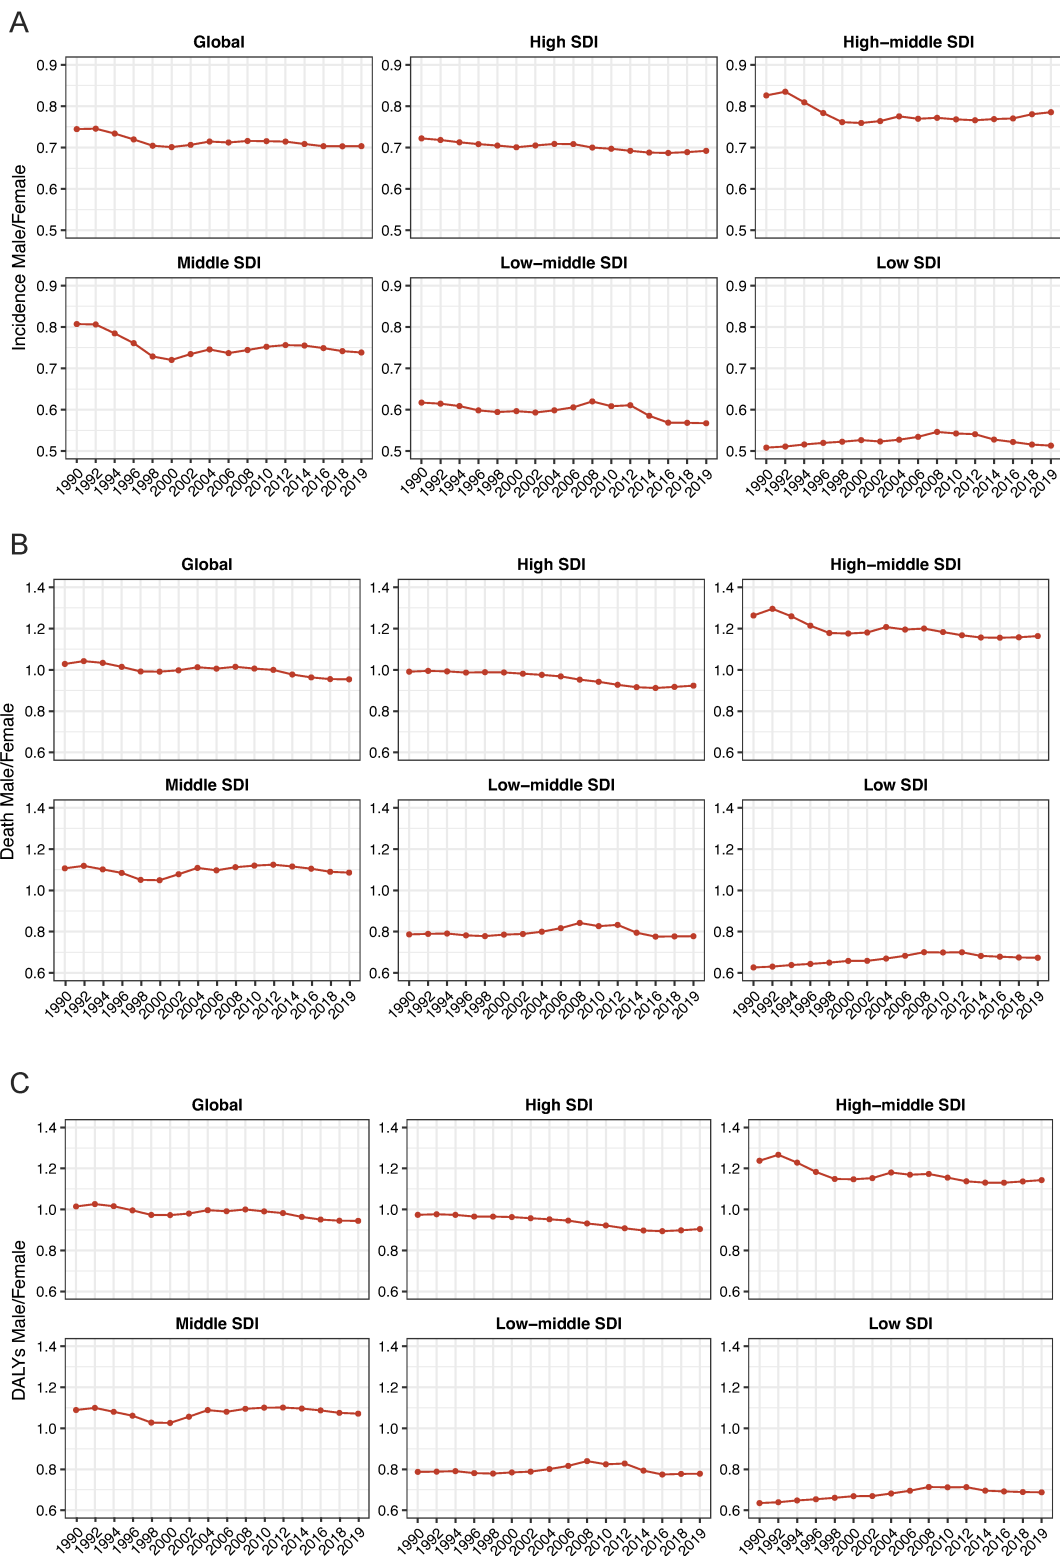

Figure S3

|               |                         |                                      |                   |                |                 |              |                          |                |                |                  |                      |                    |                  |               |                      |                |                   |                   |                            |                                         |              |                         |                                   |                           |          |                |               |                 |                              |      |
|---------------|-------------------------|--------------------------------------|-------------------|----------------|-----------------|--------------|--------------------------|----------------|----------------|------------------|----------------------|--------------------|------------------|---------------|----------------------|----------------|-------------------|-------------------|----------------------------|-----------------------------------------|--------------|-------------------------|-----------------------------------|---------------------------|----------|----------------|---------------|-----------------|------------------------------|------|
| 0.01          | 0.01                    | 0.01                                 | 0.01              | 0.01           | 0.00            | 0.00         | 0.00                     | 0.01           | 0.01           | 0.01             | 0.02                 | 0.02               | 0.01             | 0.01          | 0.04                 | 0.03           | 0.03              | 0.03              | 0.03                       | 0.05                                    | 0.06         | 0.08                    | 0.10                              | 0.08                      | 0.07     | 0.08           | 0.13          | 0.07            | Global                       | 0.3  |
| 0.01          | 0.01                    | 0.01                                 | 0.01              | 0.01           | 0.00            | 0.00         | 0.00                     | 0.01           | 0.01           | 0.01             | 0.02                 | 0.02               | 0.02             | 0.01          | 0.04                 | 0.02           | 0.01              | 0.04              | 0.04                       | 0.04                                    | 0.03         | 0.05                    | 0.05                              | 0.12                      | 0.06     | 0.07           | 0.15          | 0.15            | Low SDI                      | 0.25 |
| 0.01          | 0.00                    | 0.01                                 | 0.01              | 0.01           | 0.00            | 0.00         | 0.00                     | 0.01           | 0.01           | 0.01             | 0.03                 | 0.02               | 0.01             | 0.02          | 0.04                 | 0.03           | 0.02              | 0.03              | 0.05                       | 0.04                                    | 0.04         | 0.06                    | 0.07                              | 0.10                      | 0.06     | 0.09           | 0.15          | 0.09            | Low-middle SDI               | 0.2  |
| 0.01          | 0.00                    | 0.01                                 | 0.01              | 0.00           | 0.00            | 0.00         | 0.00                     | 0.01           | 0.01           | 0.01             | 0.01                 | 0.02               | 0.01             | 0.01          | 0.04                 | 0.02           | 0.03              | 0.03              | 0.02                       | 0.05                                    | 0.09         | 0.09                    | 0.12                              | 0.07                      | 0.07     | 0.09           | 0.12          | 0.06            | Middle SDI                   | 0.15 |
| 0.02          | 0.01                    | 0.01                                 | 0.01              | 0.00           | 0.00            | 0.00         | 0.00                     | 0.01           | 0.01           | 0.01             | 0.01                 | 0.02               | 0.01             | 0.01          | 0.03                 | 0.03           | 0.04              | 0.03              | 0.02                       | 0.06                                    | 0.06         | 0.10                    | 0.14                              | 0.06                      | 0.06     | 0.09           | 0.11          | 0.05            | High-middle SDI              | 0.1  |
| 0.02          | 0.03                    | 0.01                                 | 0.01              | 0.00           | 0.00            | 0.00         | 0.00                     | 0.01           | 0.01           | 0.01             | 0.01                 | 0.01               | 0.01             | 0.01          | 0.04                 | 0.03           | 0.05              | 0.03              | 0.02                       | 0.07                                    | 0.04         | 0.11                    | 0.13                              | 0.07                      | 0.06     | 0.05           | 0.14          | 0.04            | High SDI                     | 0.05 |
| 0.02          | 0.00                    | 0.02                                 | 0.00              | 0.00           | 0.00            | 0.00         | 0.00                     | 0.01           | 0.01           | 0.01             | 0.01                 | 0.01               | 0.00             | 0.00          | 0.03                 | 0.04           | 0.05              | 0.02              | 0.01                       | 0.04                                    | 0.09         | 0.12                    | 0.10                              | 0.06                      | 0.06     | 0.12           | 0.13          | 0.05            | High-income Asia Pacific     | 0.05 |
| 0.02          | 0.01                    | 0.00                                 | 0.01              | 0.00           | 0.00            | 0.00         | 0.00                     | 0.01           | 0.01           | 0.00             | 0.01                 | 0.01               | 0.01             | 0.01          | 0.03                 | 0.03           | 0.03              | 0.03              | 0.02                       | 0.09                                    | 0.05         | 0.06                    | 0.10                              | 0.08                      | 0.07     | 0.11           | 0.12          | 0.07            | Central Asia                 | 0.05 |
| 0.01          | 0.00                    | 0.01                                 | 0.00              | 0.00           | 0.00            | 0.00         | 0.00                     | 0.01           | 0.01           | 0.01             | 0.00                 | 0.02               | 0.00             | 0.00          | 0.03                 | 0.02           | 0.04              | 0.05              | 0.01                       | 0.05                                    | 0.13         | 0.10                    | 0.16                              | 0.04                      | 0.07     | 0.12           | 0.06          | 0.04            | East Asia                    | 0.05 |
| 0.01          | 0.00                    | 0.01                                 | 0.01              | 0.01           | 0.00            | 0.00         | 0.00                     | 0.00           | 0.01           | 0.01             | 0.05                 | 0.02               | 0.02             | 0.02          | 0.04                 | 0.03           | 0.02              | 0.03              | 0.08                       | 0.04                                    | 0.02         | 0.05                    | 0.06                              | 0.12                      | 0.05     | 0.08           | 0.15          | 0.07            | South Asia                   | 0.05 |
| 0.01          | 0.00                    | 0.01                                 | 0.00              | 0.01           | 0.00            | 0.00         | 0.00                     | 0.01           | 0.00           | 0.00             | 0.01                 | 0.03               | 0.01             | 0.01          | 0.04                 | 0.04           | 0.02              | 0.02              | 0.02                       | 0.04                                    | 0.05         | 0.10                    | 0.11                              | 0.08                      | 0.08     | 0.05           | 0.20          | 0.06            | Southeast Asia               | 0.05 |
| 0.02          | 0.07                    | 0.01                                 | 0.01              | 0.00           | 0.00            | 0.01         | 0.01                     | 0.01           | 0.01           | 0.01             | 0.01                 | 0.01               | 0.01             | 0.00          | 0.04                 | 0.03           | 0.04              | 0.02              | 0.02                       | 0.09                                    | 0.03         | 0.11                    | 0.11                              | 0.07                      | 0.05     | 0.03           | 0.15          | 0.03            | Australasia                  | 0.05 |
| 0.02          | 0.01                    | 0.01                                 | 0.00              | 0.01           | 0.01            | 0.00         | 0.01                     | 0.02           | 0.01           | 0.01             | 0.01                 | 0.01               | 0.01             | 0.01          | 0.05                 | 0.02           | 0.02              | 0.02              | 0.01                       | 0.04                                    | 0.02         | 0.08                    | 0.08                              | 0.07                      | 0.07     | 0.06           | 0.16          | 0.15            | Caribbean                    | 0.05 |
| 0.02          | 0.03                    | 0.01                                 | 0.01              | 0.00           | 0.00            | 0.00         | 0.00                     | 0.01           | 0.01           | 0.01             | 0.02                 | 0.01               | 0.01             | 0.02          | 0.03                 | 0.04           | 0.05              | 0.02              | 0.03                       | 0.08                                    | 0.02         | 0.09                    | 0.16                              | 0.06                      | 0.05     | 0.05           | 0.11          | 0.06            | Central Europe               | 0.05 |
| 0.03          | 0.03                    | 0.00                                 | 0.01              | 0.00           | 0.00            | 0.00         | 0.00                     | 0.01           | 0.01           | 0.01             | 0.02                 | 0.00               | 0.02             | 0.01          | 0.03                 | 0.04           | 0.05              | 0.02              | 0.03                       | 0.07                                    | 0.02         | 0.09                    | 0.12                              | 0.06                      | 0.05     | 0.09           | 0.11          | 0.06            | Eastern Europe               | 0.05 |
| 0.02          | 0.04                    | 0.01                                 | 0.01              | 0.00           | 0.00            | 0.00         | 0.00                     | 0.01           | 0.01           | 0.01             | 0.01                 | 0.00               | 0.01             | 0.01          | 0.04                 | 0.03           | 0.05              | 0.02              | 0.02                       | 0.09                                    | 0.03         | 0.09                    | 0.15                              | 0.07                      | 0.05     | 0.05           | 0.15          | 0.03            | Western Europe               | 0.05 |
| 0.02          | 0.01                    | 0.02                                 | 0.02              | 0.01           | 0.01            | 0.00         | 0.01                     | 0.01           | 0.00           | 0.01             | 0.00                 | 0.00               | 0.01             | 0.00          | 0.06                 | 0.03           | 0.03              | 0.01              | 0.01                       | 0.07                                    | 0.02         | 0.06                    | 0.06                              | 0.07                      | 0.11     | 0.14           | 0.10          | 0.13            | Andean Latin America         | 0.05 |
| 0.02          | 0.01                    | 0.01                                 | 0.02              | 0.01           | 0.00            | 0.00         | 0.01                     | 0.01           | 0.00           | 0.01             | 0.00                 | 0.00               | 0.01             | 0.00          | 0.04                 | 0.04           | 0.03              | 0.01              | 0.01                       | 0.05                                    | 0.02         | 0.08                    | 0.06                              | 0.08                      | 0.11     | 0.10           | 0.12          | 0.12            | Central Latin America        | 0.05 |
| 0.03          | 0.02                    | 0.02                                 | 0.03              | 0.00           | 0.00            | 0.00         | 0.00                     | 0.00           | 0.01           | 0.01             | 0.00                 | 0.00               | 0.01             | 0.01          | 0.05                 | 0.03           | 0.04              | 0.02              | 0.01                       | 0.05                                    | 0.01         | 0.10                    | 0.09                              | 0.07                      | 0.07     | 0.06           | 0.14          | 0.11            | Southern Latin America       | 0.05 |
| 0.01          | 0.02                    | 0.01                                 | 0.01              | 0.00           | 0.01            | 0.01         | 0.01                     | 0.01           | 0.01           | 0.01             | 0.02                 | 0.00               | 0.01             | 0.02          | 0.04                 | 0.03           | 0.03              | 0.04              | 0.02                       | 0.08                                    | 0.01         | 0.09                    | 0.07                              | 0.08                      | 0.07     | 0.07           | 0.13          | 0.10            | Tropical Latin America       | 0.05 |
| 0.01          | 0.01                    | 0.01                                 | 0.00              | 0.01           | 0.00            | 0.00         | 0.00                     | 0.01           | 0.02           | 0.01             | 0.00                 | 0.01               | 0.01             | 0.01          | 0.05                 | 0.02           | 0.03              | 0.02              | 0.01                       | 0.07                                    | 0.05         | 0.08                    | 0.10                              | 0.09                      | 0.10     | 0.08           | 0.16          | 0.03            | North Africa and Middle East | 0.05 |
| 0.02          | 0.04                    | 0.00                                 | 0.01              | 0.00           | 0.00            | 0.00         | 0.00                     | 0.01           | 0.01           | 0.01             | 0.00                 | 0.00               | 0.01             | 0.00          | 0.04                 | 0.03           | 0.05              | 0.02              | 0.01                       | 0.08                                    | 0.03         | 0.12                    | 0.13                              | 0.07                      | 0.06     | 0.03           | 0.14          | 0.04            | High-income North America    | 0.05 |
| 0.00          | 0.00                    | 0.00                                 | 0.00              | 0.00           | 0.01            | 0.00         | 0.00                     | 0.01           | 0.01           | 0.00             | 0.00                 | 0.01               | 0.01             | 0.00          | 0.02                 | 0.01           | 0.01              | 0.01              | 0.02                       | 0.03                                    | 0.02         | 0.05                    | 0.09                              | 0.07                      | 0.07     | 0.11           | 0.32          | 0.12            | Oceania                      | 0.05 |
| 0.01          | 0.01                    | 0.00                                 | 0.01              | 0.00           | 0.01            | 0.00         | 0.00                     | 0.01           | 0.01           | 0.01             | 0.00                 | 0.01               | 0.01             | 0.01          | 0.04                 | 0.02           | 0.02              | 0.05              | 0.02                       | 0.03                                    | 0.02         | 0.05                    | 0.07                              | 0.10                      | 0.06     | 0.06           | 0.17          | 0.21            | Central Sub-Saharan Africa   | 0.05 |
| 0.01          | 0.01                    | 0.00                                 | 0.01              | 0.01           | 0.00            | 0.00         | 0.00                     | 0.01           | 0.01           | 0.01             | 0.01                 | 0.02               | 0.02             | 0.01          | 0.03                 | 0.03           | 0.01              | 0.06              | 0.02                       | 0.03                                    | 0.02         | 0.05                    | 0.03                              | 0.15                      | 0.06     | 0.06           | 0.12          | 0.19            | Eastern Sub-Saharan Africa   | 0.05 |
| 0.01          | 0.01                    | 0.00                                 | 0.00              | 0.00           | 0.01            | 0.00         | 0.00                     | 0.01           | 0.01           | 0.01             | 0.01                 | 0.01               | 0.01             | 0.01          | 0.07                 | 0.02           | 0.03              | 0.06              | 0.02                       | 0.03                                    | 0.08         | 0.06                    | 0.08                              | 0.06                      | 0.05     | 0.04           | 0.13          | 0.17            | Southern Sub-Saharan Africa  | 0.05 |
| 0.01          | 0.01                    | 0.00                                 | 0.00              | 0.00           | 0.01            | 0.00         | 0.00                     | 0.00           | 0.01           | 0.00             | 0.00                 | 0.01               | 0.03             | 0.01          | 0.05                 | 0.02           | 0.02              | 0.02              | 0.01                       | 0.04                                    | 0.05         | 0.05                    | 0.05                              | 0.08                      | 0.06     | 0.06           | 0.19          | 0.19            | Western Sub-Saharan Africa   | 0.05 |
| Kidney cancer | Malignant skin melanoma | Gallbladder and biliary tract cancer | Testicular cancer | Thyroid cancer | Prostate cancer | Mesothelioma | Non-melanoma skin cancer | Uterine cancer | Bladder cancer | Multiple myeloma | Other pharynx cancer | Nasopharynx cancer | Hodgkin lymphoma | Larynx cancer | Non Hodgkin lymphoma | Ovarian cancer | Pancreatic cancer | Esophageal cancer | Lip and oral cavity cancer | Brain and central nervous system cancer | Liver cancer | Colon and rectum cancer | Tracheal bronchus and lung cancer | Other malignant neoplasms | Leukemia | Stomach cancer | Breast cancer | Cervical cancer |                              |      |

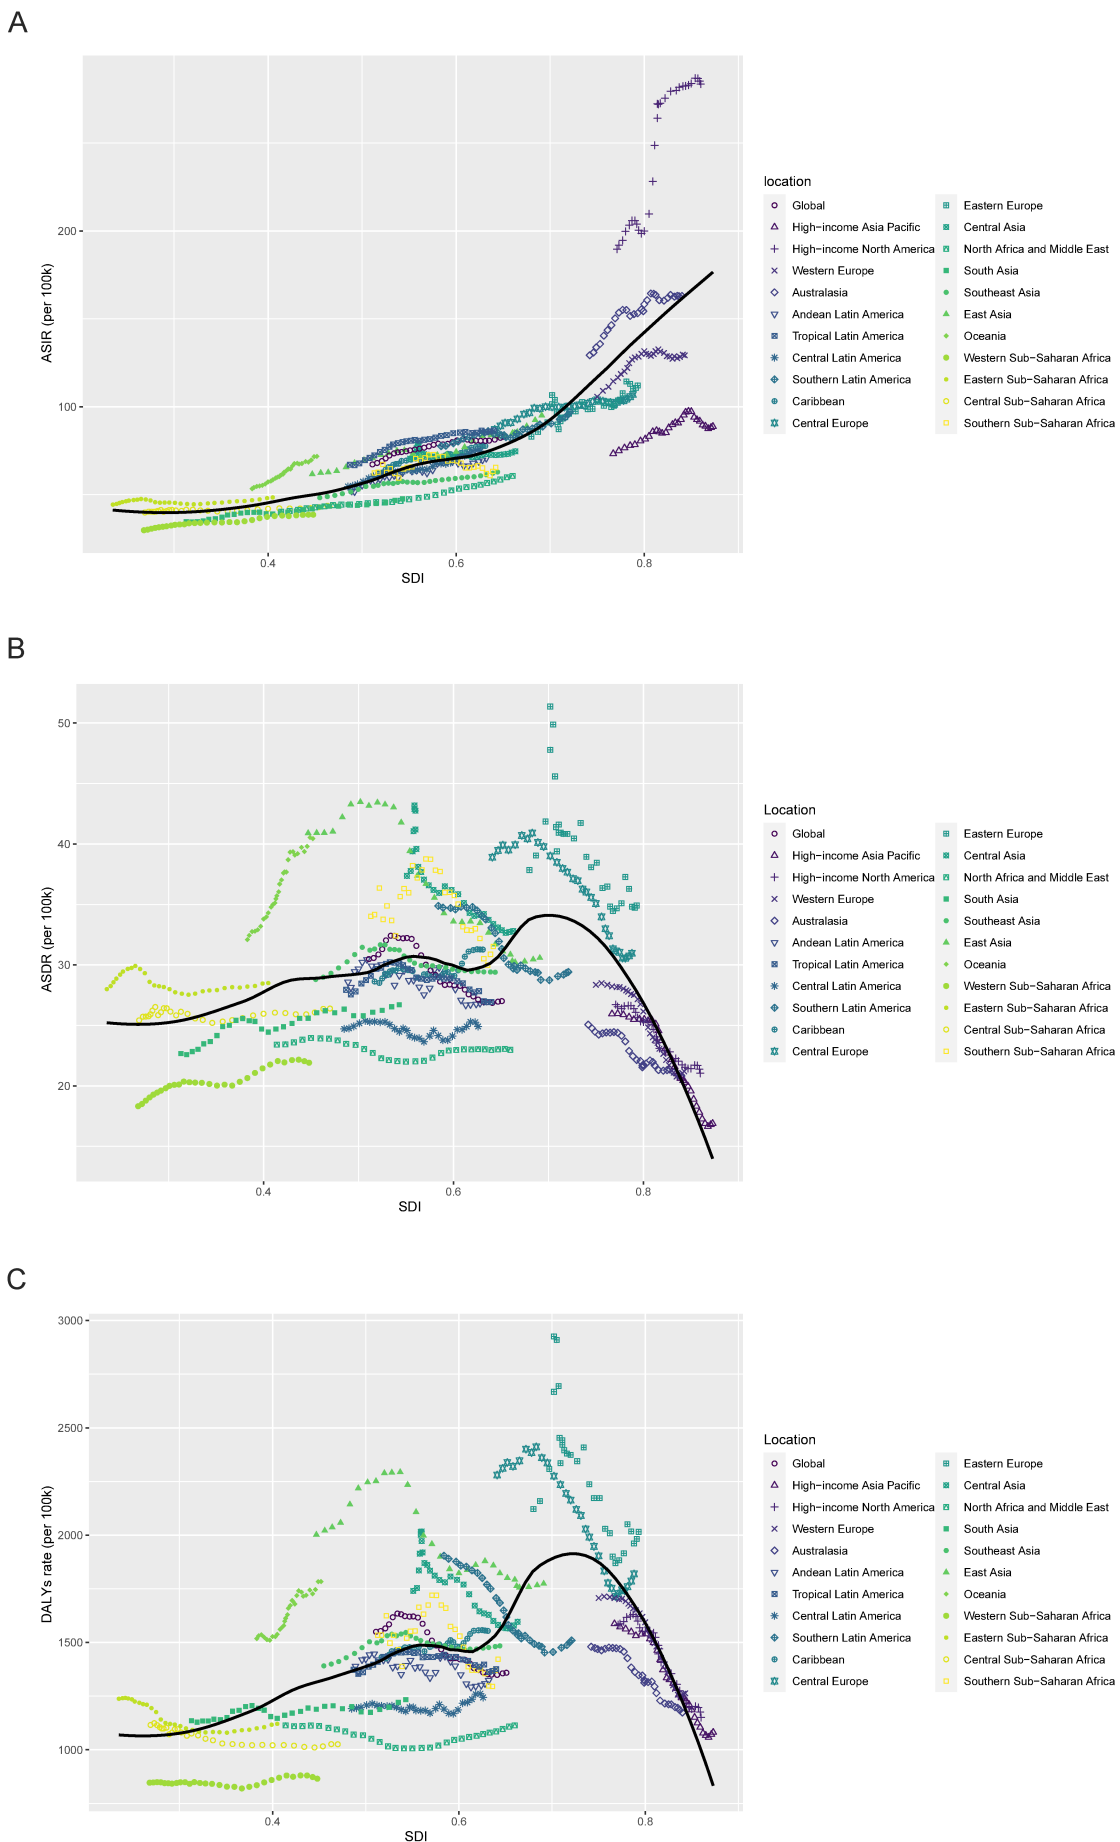

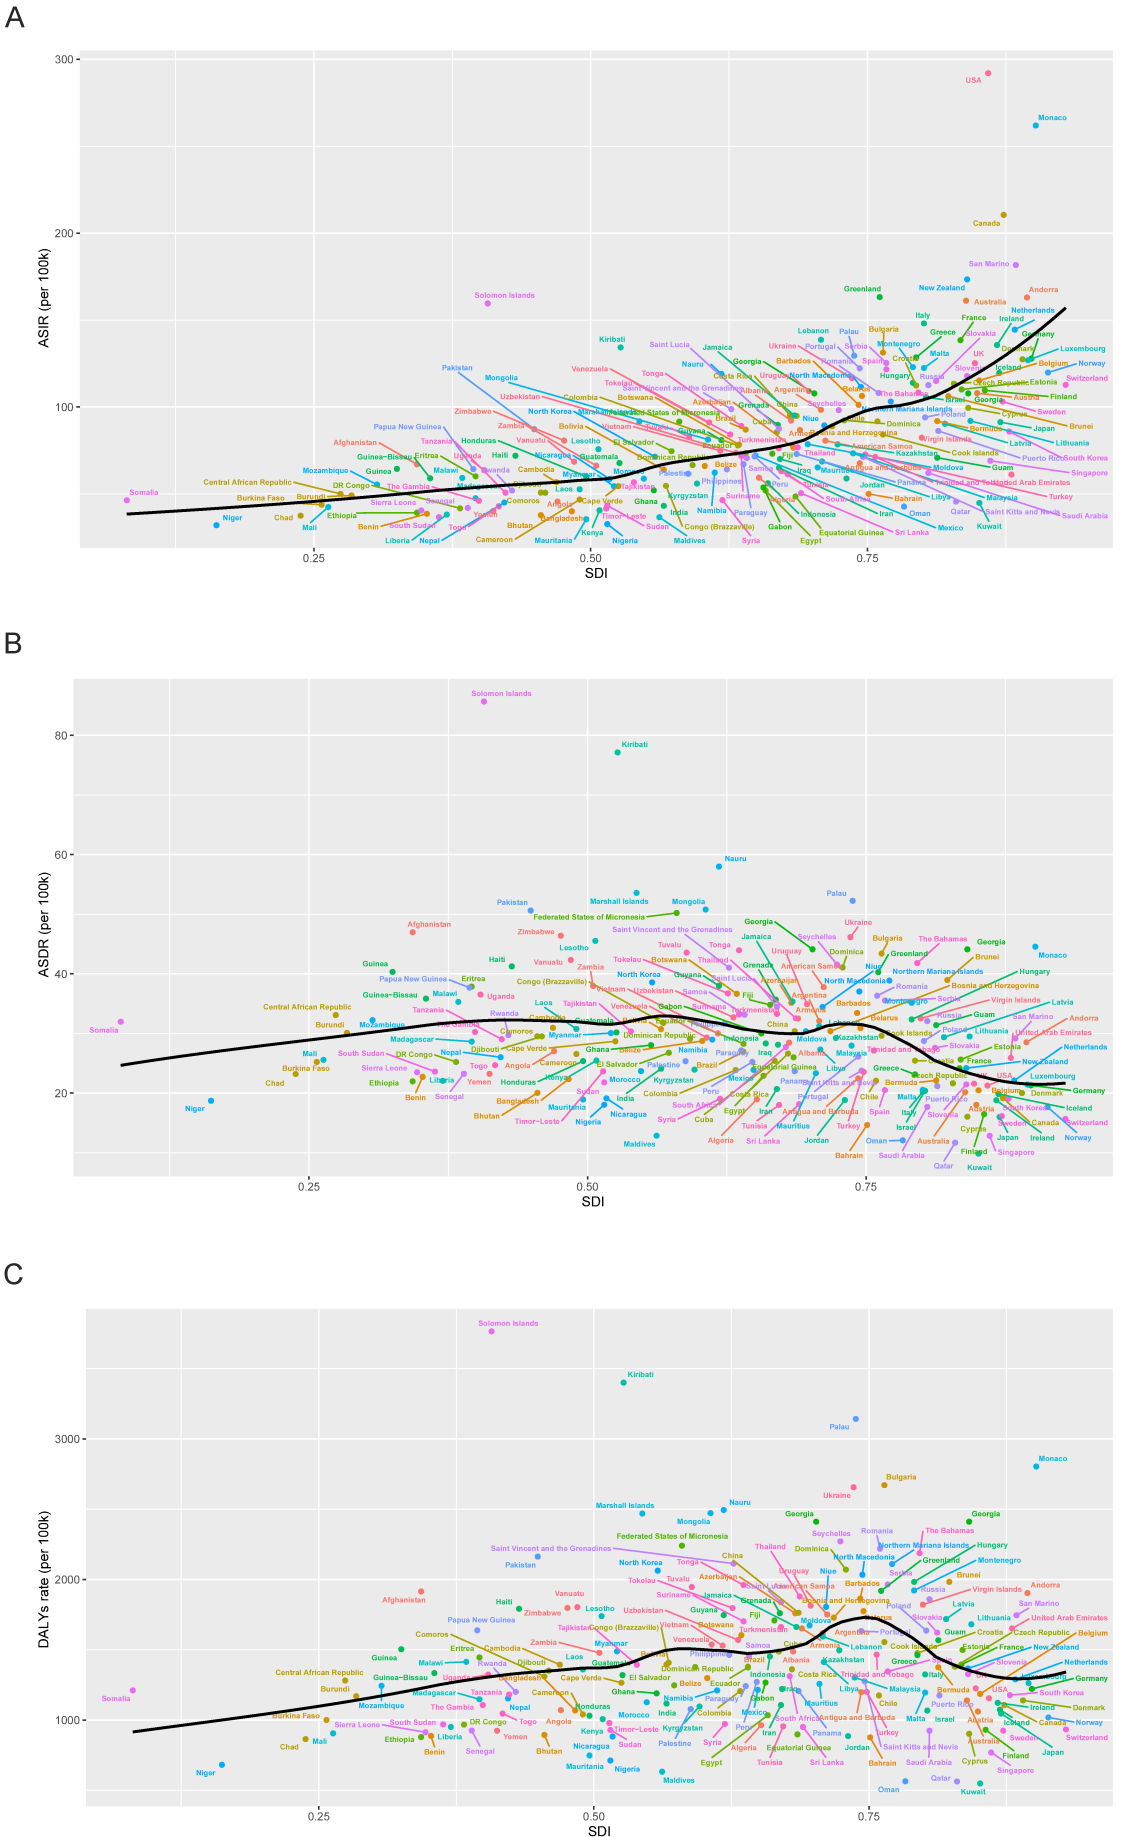

A

Figure S6

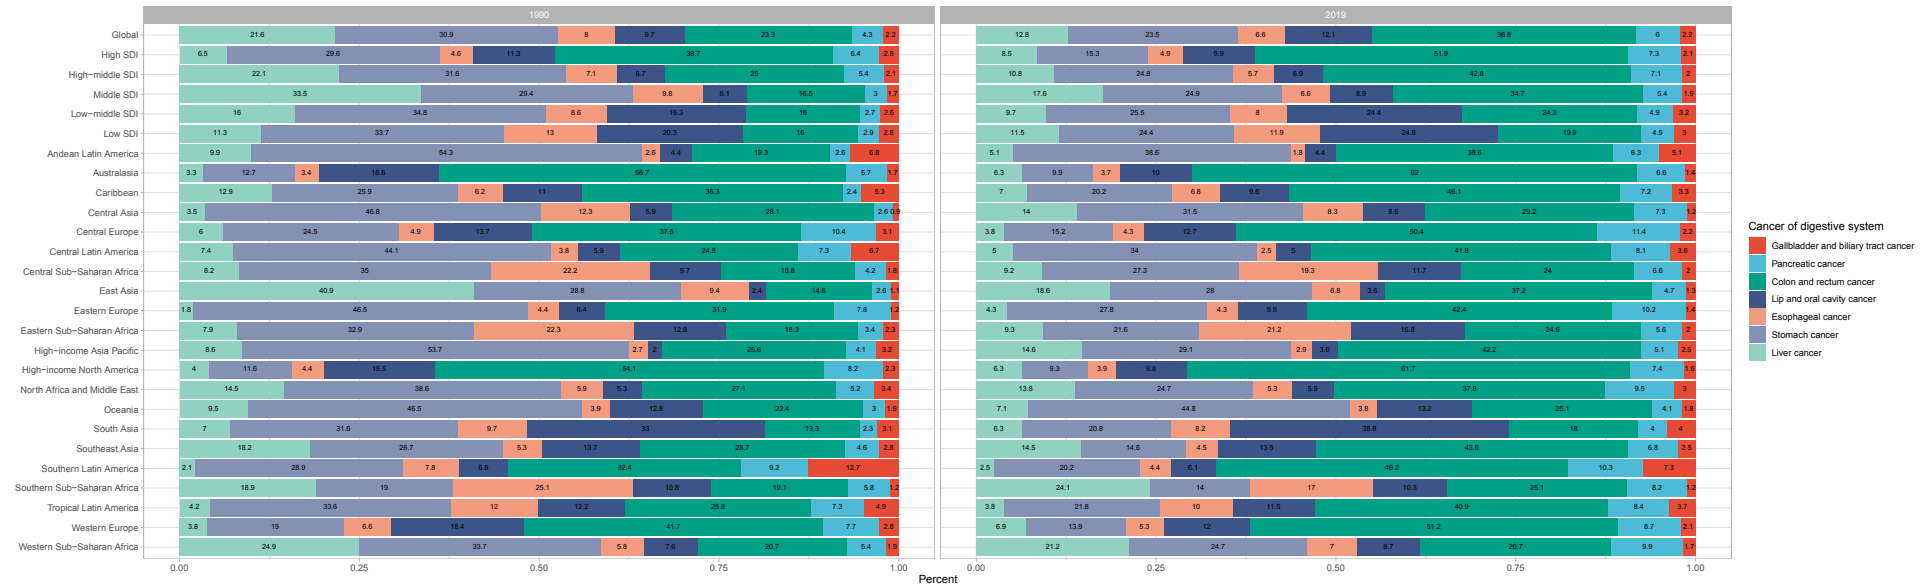

B

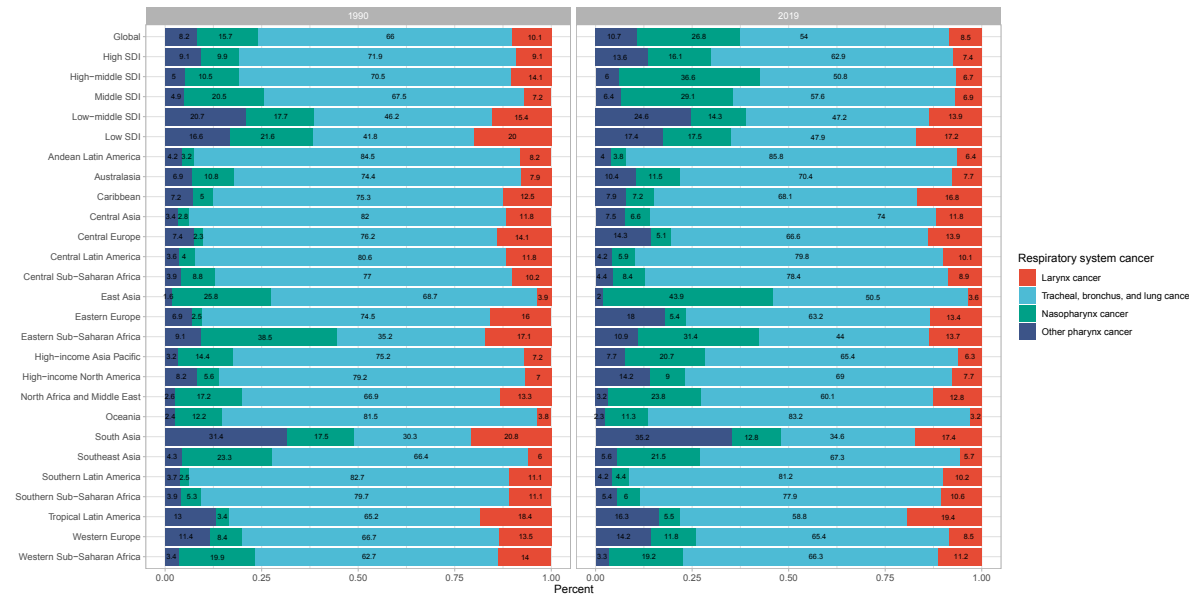

A

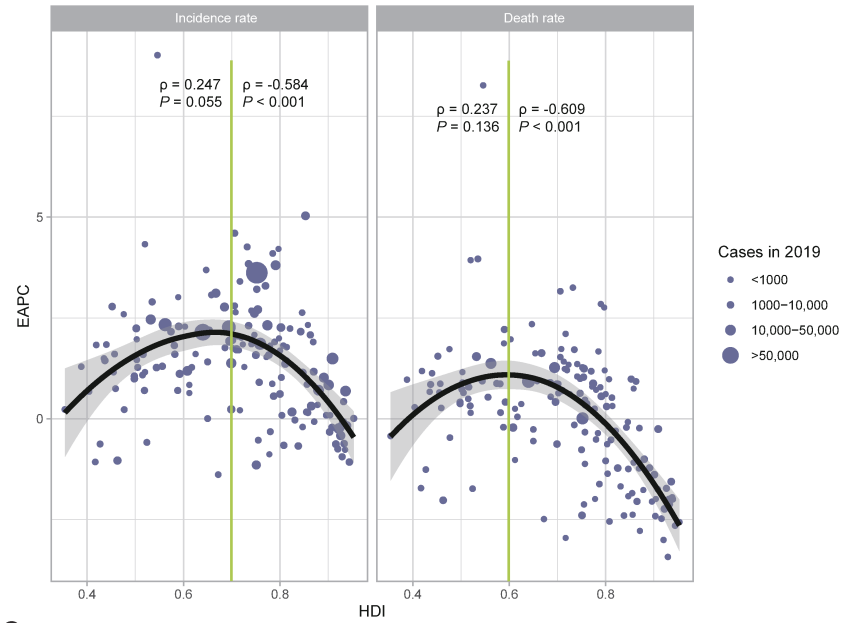

B

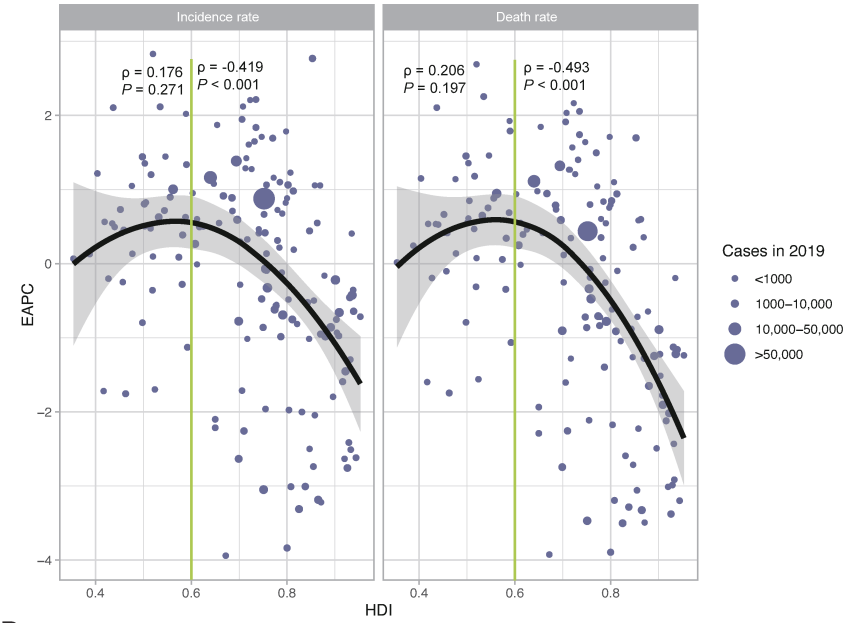

C

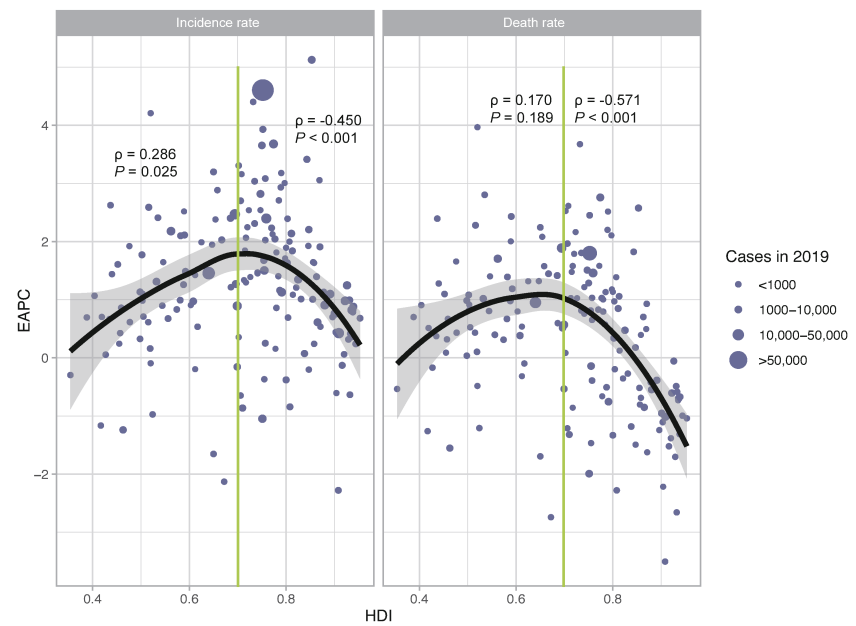

D

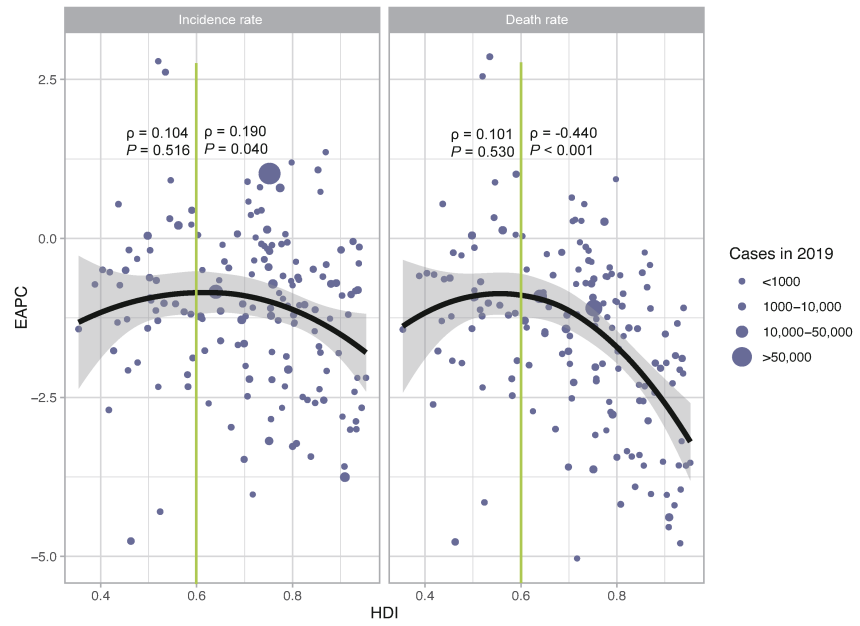



A

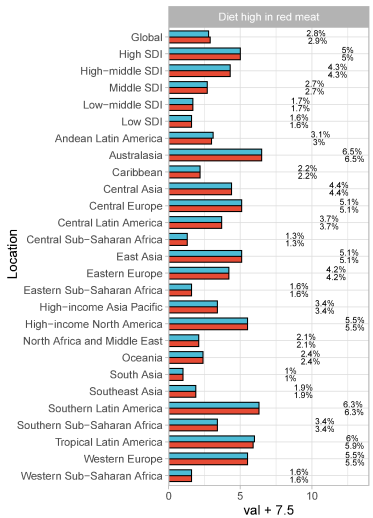

B

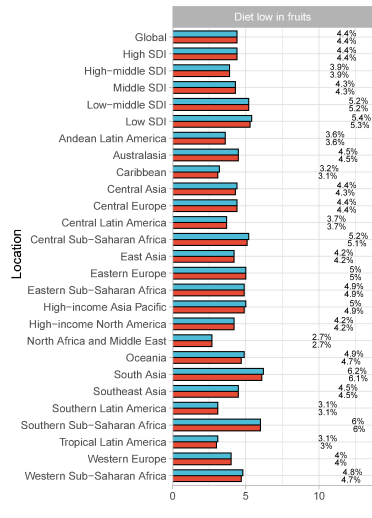

D

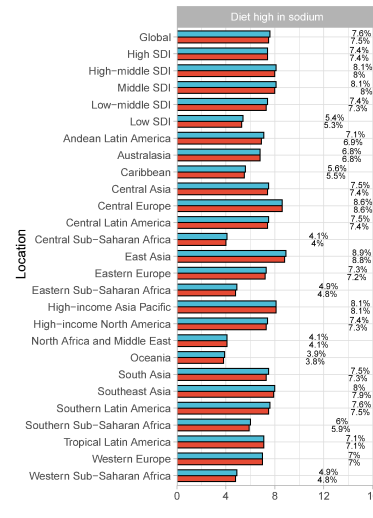

C

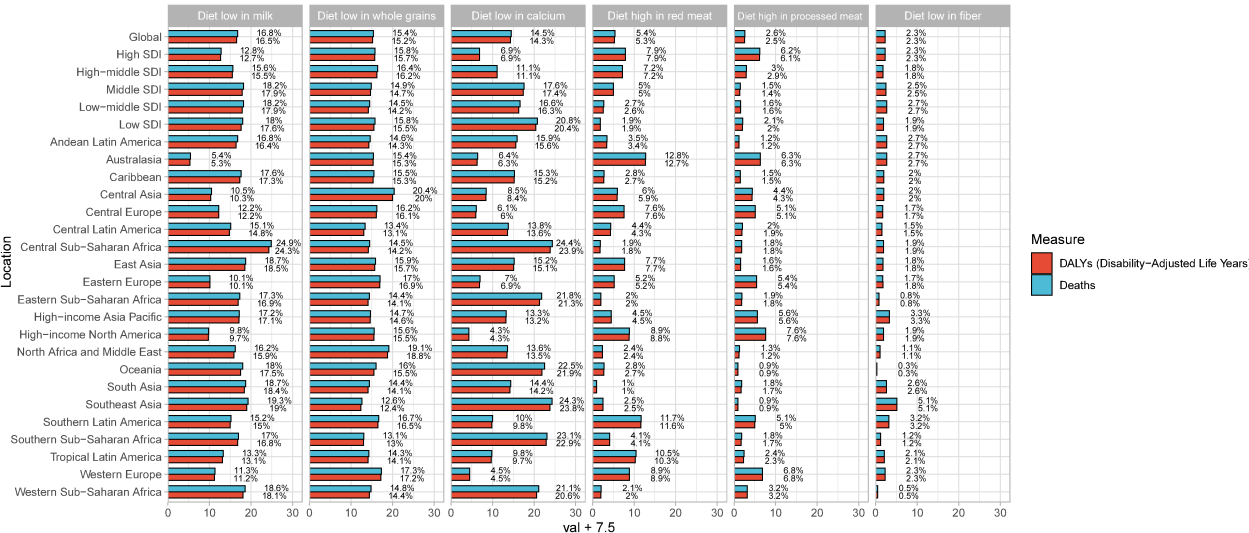

Measure  
■ DALYs (Disability-Adjusted Life Years)  
■ Deaths

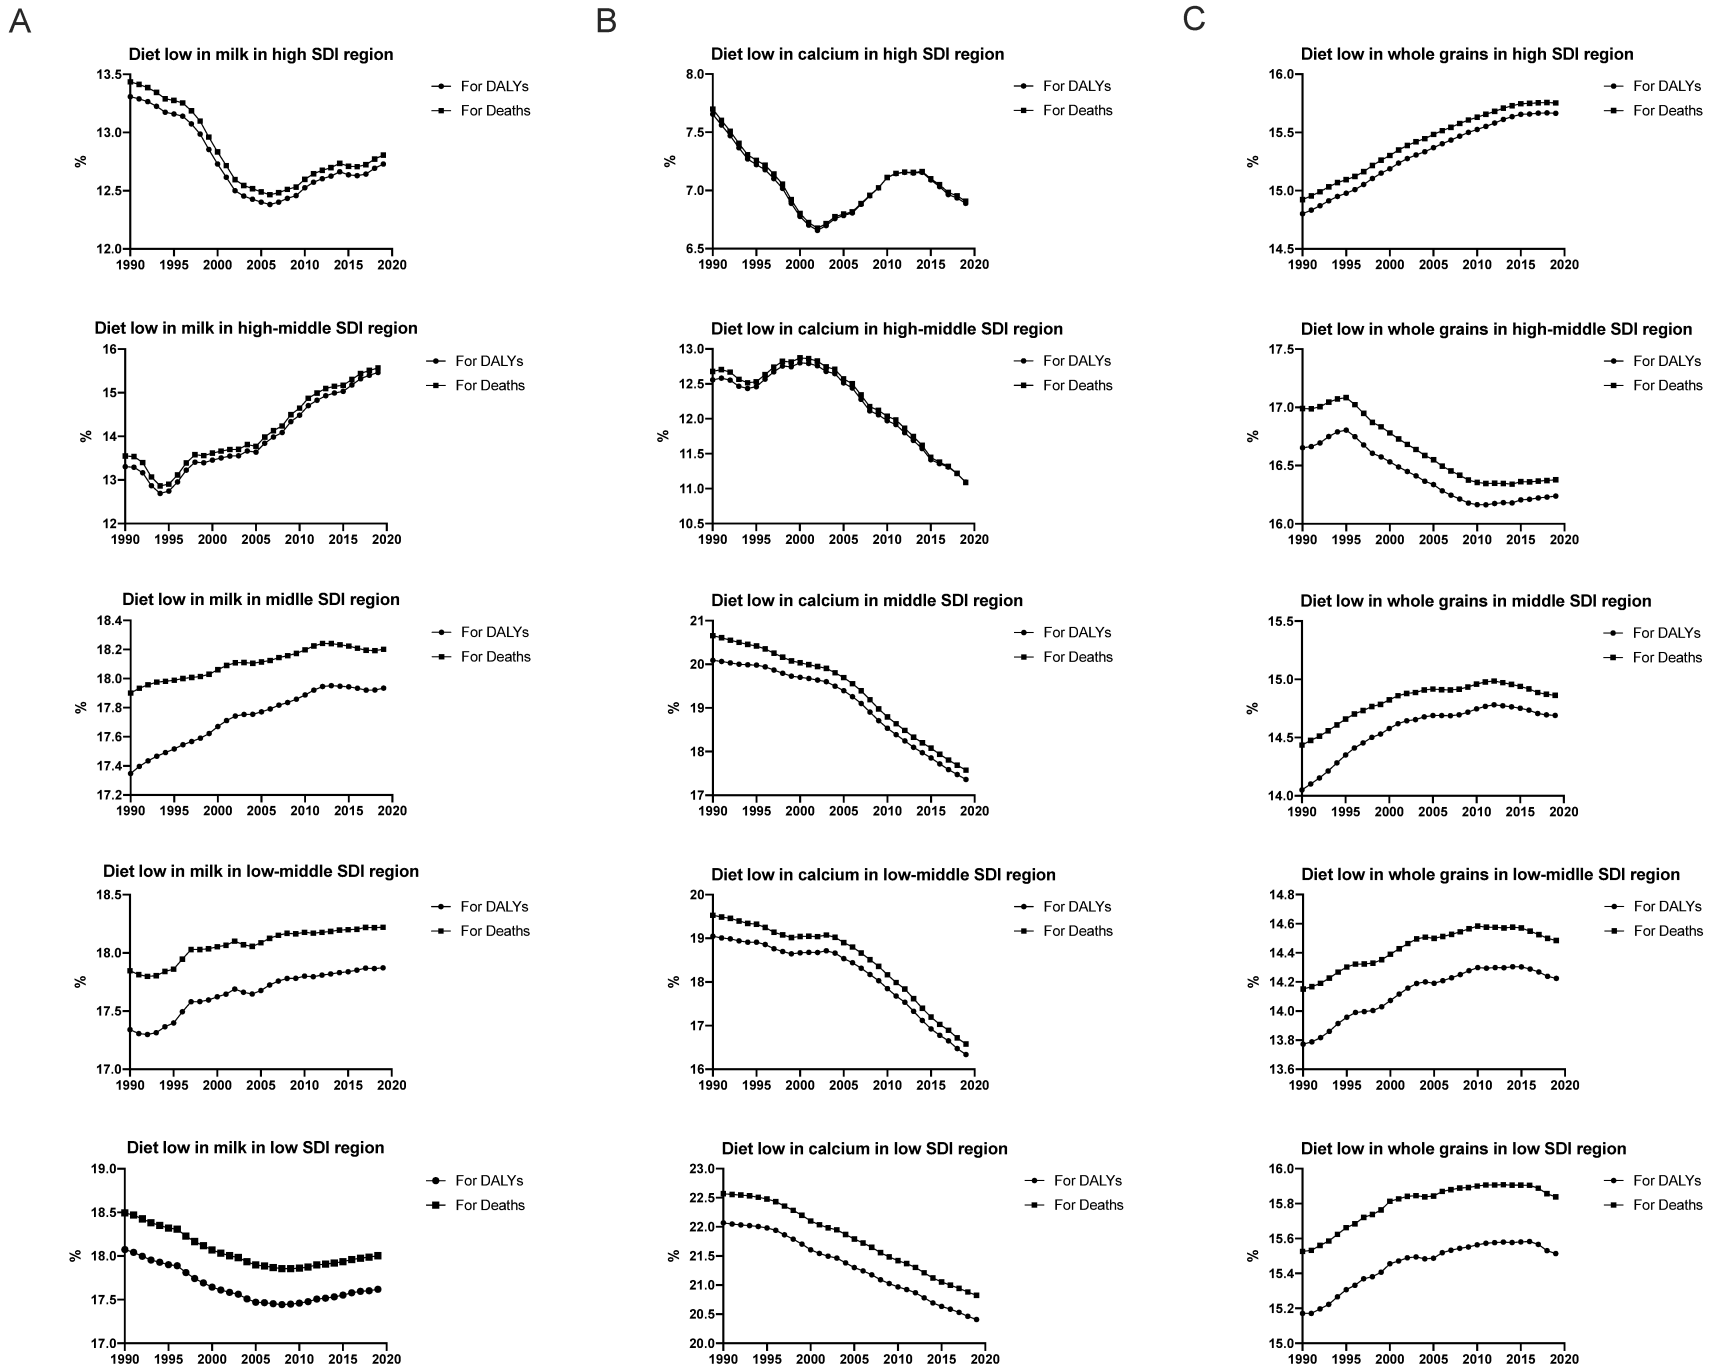

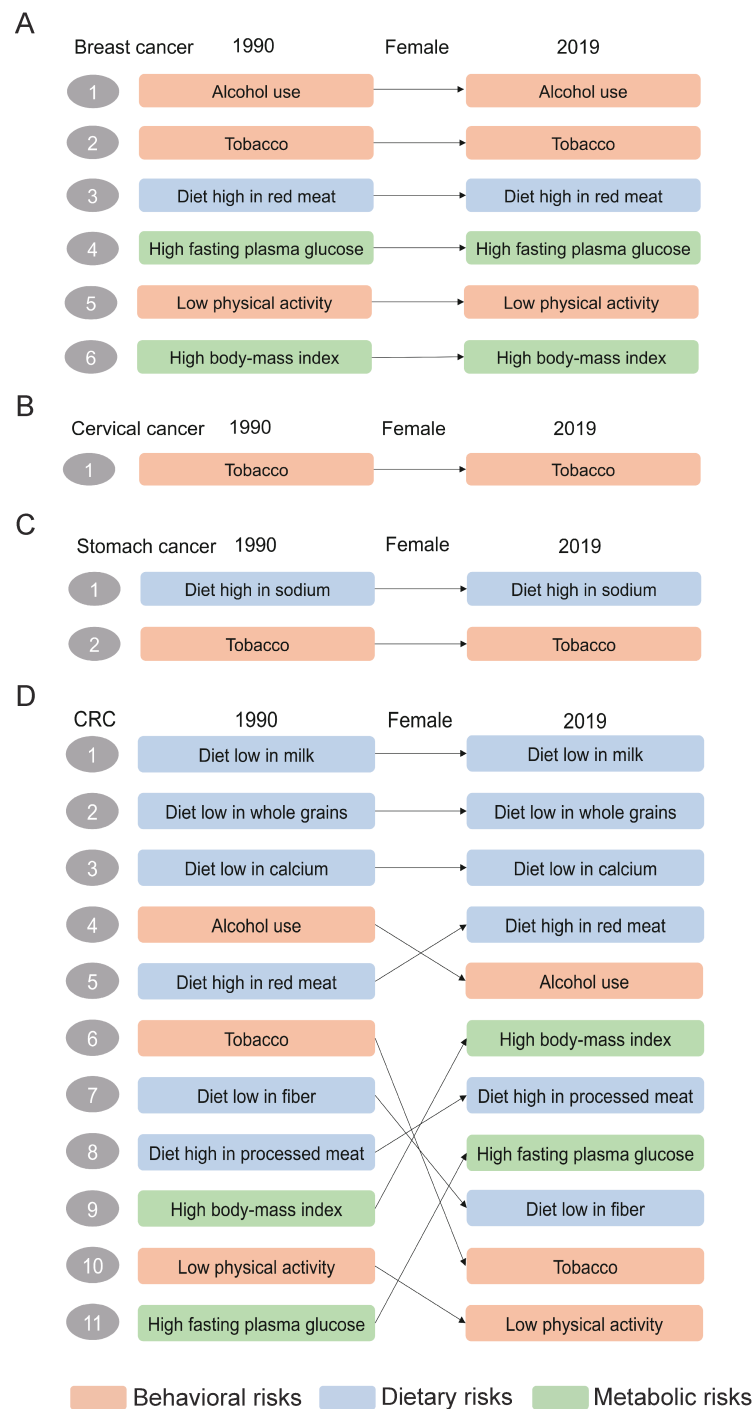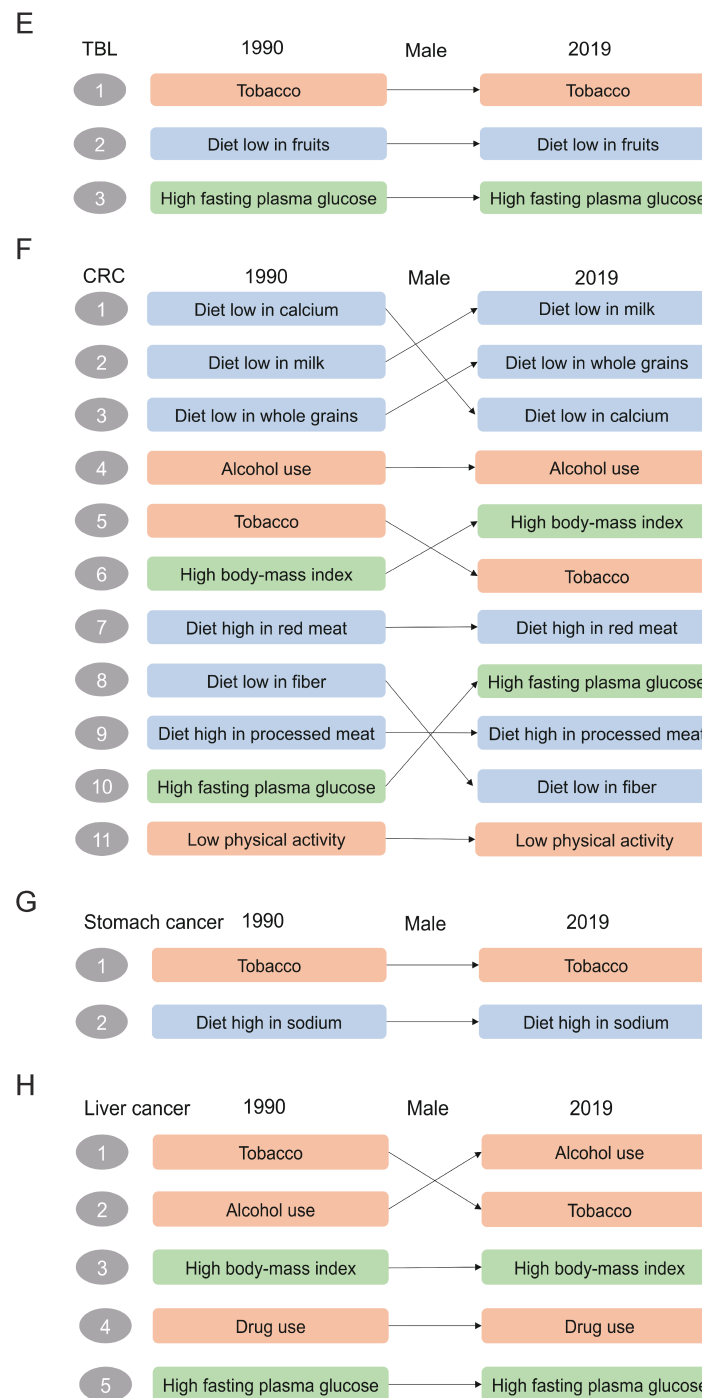

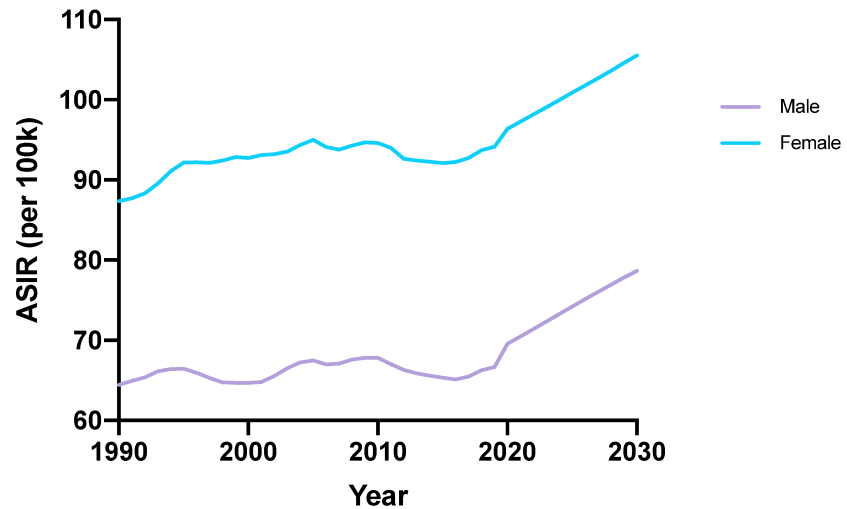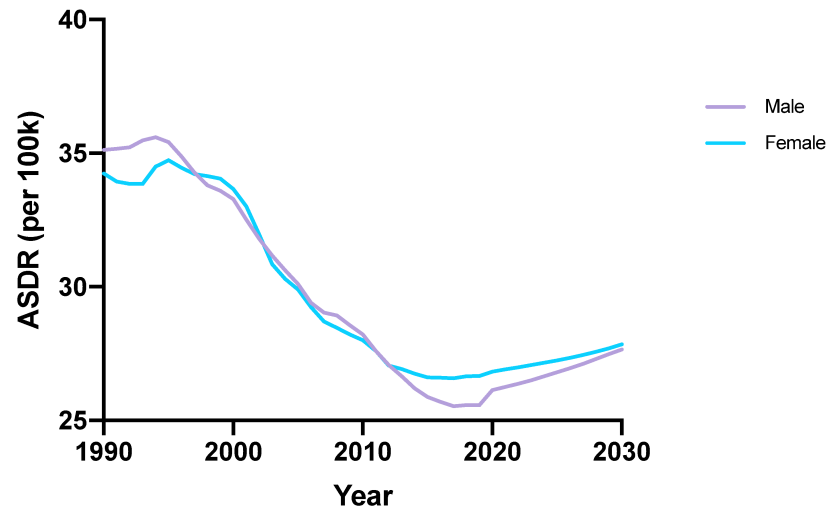

Supplement: bmjonc-2023-000049supp001_data_supplement.pdf [file bmjonc-2023-000049supp001_data_supplement.pdf]
